# Supplementary material for: Enantioselective and diastereoselective azo-coupling/iminium-cyclizations: a unified strategy for the total syntheses of (–)-psychotriasine and (+)-pestalazine B
Source: PubMed Central journal article supplement (PMC5659145; doi:10.1039/c5sc00338e), 2015-05-05

**Enantioselective and Diastereoselective Azo-  
coupling/Iminium-Cyclizations: A Unified Strategy for the Total  
Syntheses of (-)-Psychotriasine and (+)-Pestalazine B**

Qi Li,<sup>a,b</sup> Tingting Xia,<sup>b</sup> Licheng Yao,<sup>b</sup> Haiteng Deng,<sup>\*,c</sup> Xuebin Liao<sup>\*,b</sup>

<sup>a</sup> *Tsinghua-Peking Joint Center for Life Sciences, Beijing 100084, China*

<sup>b</sup> *Department of Pharmacology and Pharmaceutical Sciences,  
School of Medicine, Collaborative Innovation Center for Diagnosis and Treatment of  
Infectious Diseases, Tsinghua University, Beijing, 100084, China*

<sup>c</sup> *MOE Key Laboratory of Bioinformatics, School of Life Sciences, Tsinghua  
University, Beijing 100084 (China)*

**Supporting Information**

**Table of Contents**

|                                                   |    |
|---------------------------------------------------|----|
| Experimental procedures and characterization data | 2  |
| X-ray structure of <b>16</b>                      | 16 |
| CD spectra of (+)-Pestalazine B                   | 22 |
| NMR spectra                                       | 23 |

**General Methods.** All commercially available reagents were used without further purification. All dry solvents such as toluene, tetrahydrofuran, dichloromethane, acetonitrile and ethyl ether were purified by solvent purification systems. Flash column chromatography was performed on silica gel (200-300 mesh). <sup>1</sup>H NMR spectra were recorded on a 400 MHz or 600 MHz NMR spectrometer and <sup>13</sup>C NMR spectra were recorded on a 100 MHz or 150 MHz NMR spectrometer. Enantiomeric ratio was measured on a Shimadzu Chiral HPLC using Chiralpak OD-H, AS-H or AD-H columns.

**S-Table1. Enantioselective azo-coupling of tryptaminederivatives.**<sup>[a] [b]</sup>

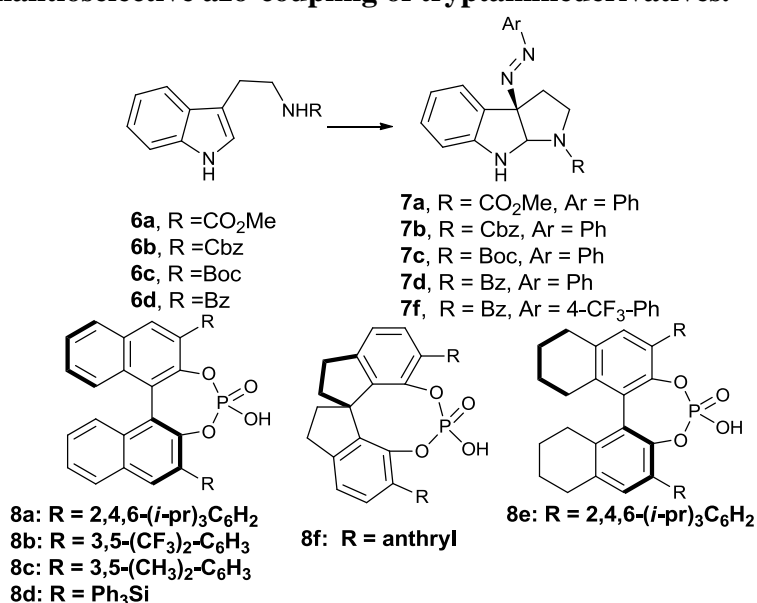

| Entry | Substrate | Solvent           | CPA | Additive <sup>c</sup> | T (°C) | Product   | Yield <sup>d</sup>        | Er                               |
|-------|-----------|-------------------|-----|-----------------------|--------|-----------|---------------------------|----------------------------------|
| 1     | <b>6a</b> | toluene           | 8a  | --                    | 0      | <b>7a</b> | 92%                       | 52.5:47.5                        |
| 2     | <b>6a</b> | mesitylene        | 8a  | --                    | 0      | <b>7a</b> | 63%                       | 54:46                            |
| 3     | <b>6a</b> | PhF               | 8a  | --                    | 0      | <b>7a</b> | 89%                       | 50:50                            |
| 4     | <b>6a</b> | Et <sub>2</sub> O | 8a  | --                    | 0      | <b>7a</b> | 70%                       | 64:36                            |
| 5     | <b>6a</b> | <i>t</i> -BuOMe   | 8a  | --                    | 0      | <b>7a</b> | 89%                       | 67:33                            |
| 6     | <b>6b</b> | <i>t</i> -BuOMe   | 8a  | --                    | 0      | <b>7b</b> | 82%                       | 61:39                            |
| 7     | <b>6c</b> | <i>t</i> -BuOMe   | 8a  | --                    | 0      | <b>7c</b> | 74%                       | 64:36                            |
| 8     | <b>6d</b> | <i>t</i> -BuOMe   | 8a  | --                    | 0      | <b>7d</b> | 74%                       | 27:73                            |
| 9     | <b>6d</b> | <i>t</i> -BuOMe   | 8a  | --                    | -40    | <b>7d</b> | 60%                       | 25:75                            |
| 10    | <b>6d</b> | <i>t</i> -BuOMe   | 8b  | --                    | -40    | <b>7d</b> | 68%                       | 62:38                            |
| 11    | <b>6d</b> | <i>t</i> -BuOMe   | 8c  | --                    | -40    | <b>7d</b> | 54%                       | 60:40                            |
| 12    | <b>6d</b> | <i>t</i> -BuOMe   | 8d  | --                    | -40    | <b>7d</b> | 44%                       | 58:42                            |
| 13    | <b>6d</b> | <i>t</i> -BuOMe   | 8e  | --                    | -40    | <b>7d</b> | 94%                       | 26:74                            |
| 14    | <b>6d</b> | <i>t</i> -BuOMe   | 8f  | --                    | -40    | <b>7d</b> | 76%                       | 26:74                            |
| 15    | <b>6d</b> | <i>t</i> -BuOMe   | 8a  | 1                     | -40    | <b>7d</b> | 60%                       | 20:80                            |
| 16    | <b>6d</b> | <i>t</i> -BuOMe   | 8a  | 2                     | -40    | <b>7d</b> | 60%                       | 20:80                            |
| 17    | <b>6d</b> | <i>t</i> -BuOMe   | 8a  | 3                     | -40    | <b>7d</b> | 91%                       | 14.5:85.5                        |
| 18    | <b>6d</b> | <i>t</i> -BuOMe   | 8a  | 3                     | -40    | <b>7d</b> | 88%                       | 9.5:90.5                         |
| 19    | <b>6d</b> | <i>t</i> -BuOMe   | 8a  | 3                     | -60    | <b>7f</b> | 99%<br>(69%) <sup>e</sup> | 7.5:92.5<br>(<2:98) <sup>e</sup> |

[<sup>a</sup>] Condition A (no additive): **6** (0.1 mmol), ArN<sub>2</sub>BF<sub>4</sub> (0.11 mmol), CPA catalyst (0.005 mmol) and Na<sub>2</sub>CO<sub>3</sub> (0.11 mmol) in solvent (1.0 mL); Condition B (with additive): **6** (0.1 mmol), ArN<sub>2</sub>BF<sub>4</sub> (0.11 mmol), CPA (0.005 mmol), additive (0.1 mL of 0.01 M stock solution in *t*-BuOMe) and Na<sub>2</sub>CO<sub>3</sub> (0.11 mmol) in *t*-BuOMe (0.9 mL). [<sup>b</sup>] Entries 1-17: Ar = Ph; entries 18-19: Ar = 4-CF<sub>3</sub>C<sub>6</sub>H<sub>4</sub>. [<sup>c</sup>] Additive 1 = pyridine, additive 2 = 2,6-lutidine, additive 3 = 2,6-di-*t*-Bu-pyridine; [<sup>d</sup>] Isolated yield; [<sup>e</sup>] Recrystallized in petroleum ether.

### Synthesis of Compound **7f**

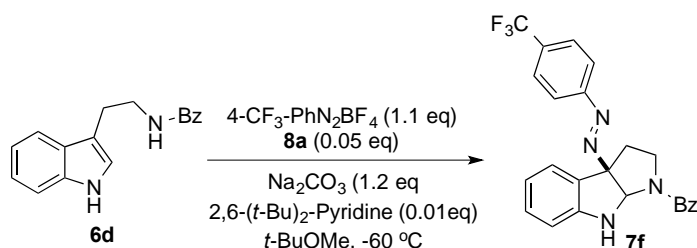

To a stirred mixture of tryptamine derivative **6d** (26.4 mg, 0.1 mmol), Na<sub>2</sub>CO<sub>3</sub> (11.6 mg, 0.11 mmol), CPA1 (3.8 mg, 0.005 mmol), a solution of 2,6-di-*t*-Bupyridine (0.1 mL, 0.001 mmol, 0.01 M) in *t*-BuOMe and *t*-BuOMe (0.9 mL) was added 4-trifluoromethylbenzene diazoium tetrafluoroborate (28.6 mg, 0.11 mmol) in one portion at -60 °C. Then the suspension was kept stirring at -60 °C until **6d** was consumed (detected by TLC). The reaction mixture was then diluted with H<sub>2</sub>O and EtOAc. The organic layer was washed with H<sub>2</sub>O and brine, dried over Na<sub>2</sub>SO<sub>4</sub>, filtered and concentrated under vacuum. The resulting residue was purified by flash column chromatography (silica gel, petroleum ether/ethyl acetate = 5/1) to give azo compound **7f** as yellow oil (43.4 mg, 99% yield, er = 7.5:92.5; 30 mg, 69% yield, er < 2:98 after recrystallizing by petroleum ether).

<sup>1</sup>H NMR (400 MHz, CDCl<sub>3</sub>) δ 7.81 (d, *J* = 8.0 Hz, 2H), 7.72 (d, *J* = 8.0 Hz, 2H), 7.55-7.47 (m, 2H), 7.49-7.35 (m, 3H), 7.29 (d, *J* = 7.6 Hz, 1H), 7.18 (t, *J* = 7.6 Hz, 1H), 6.80 (t, *J* = 7.6 Hz, 1H), 6.71 (d, *J* = 8.0 Hz, 1H), 6.38 (s, 1H), 3.82-3.72 (m, 1H), 3.63-3.50 (m, 1H), 2.65-2.54 (m, 2H); <sup>13</sup>C NMR (100 MHz, CDCl<sub>3</sub>) δ 169.8, 153.7, 150.8, 135.9, 132.1 (q, *J* = 32.3 Hz), 130.32, 130.25, 128.3, 127.2, 126.3 (q, *J* = 3.7 Hz), 125.8,

125.1, 122.8, 119.0, 109.7, 89.1, 77.9, 48.6, 34.8. HRMS calcd for C<sub>24</sub>H<sub>20</sub>F<sub>3</sub>N<sub>4</sub>O [M+H]: 437.1589; found: 437.1587. HPLC (ChiralPak AD-H column) 70:30 (Hex/*i*-PrOH) 1 mL/min; t<sub>major</sub> (14.18 min), t<sub>minor</sub> (19.39 min); 7.5:92.5 er (er <2:98, recrystallized by petroleum ether).

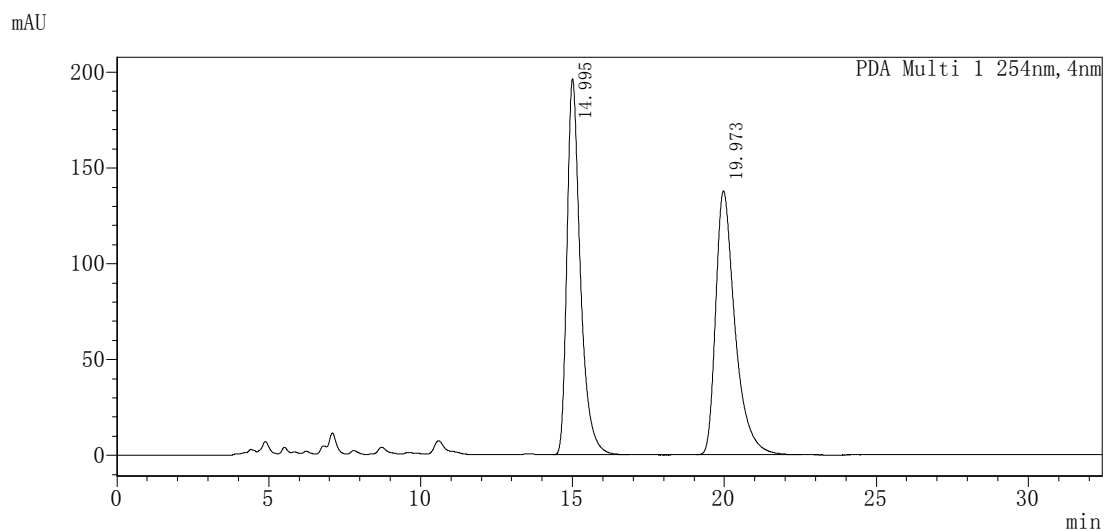

| Peak #1 | Retention Time (min) | Area    | Height | Area Percent |
|---------|----------------------|---------|--------|--------------|
| 1       | 14.995               | 6004225 | 196450 | 49.644       |
| 2       | 19.973               | 6090256 | 137687 | 50.356       |

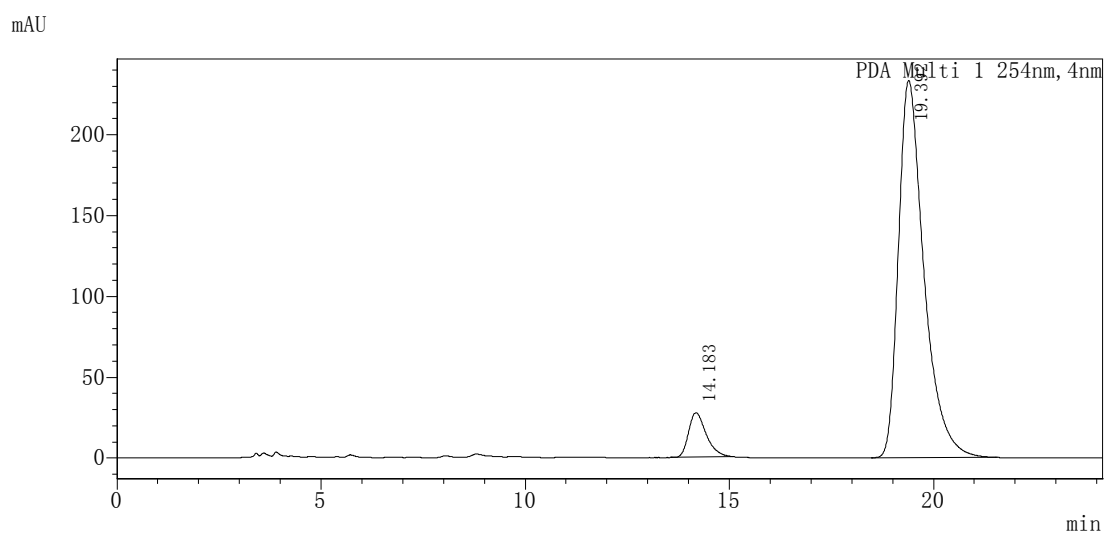

| Peak #1 | Retention Time (min) | Area     | Height | Area Percent |
|---------|----------------------|----------|--------|--------------|
| 1       | 14.183               | 825388   | 27559  | 7.518        |
| 2       | 19.392               | 10154095 | 233468 | 92.482       |

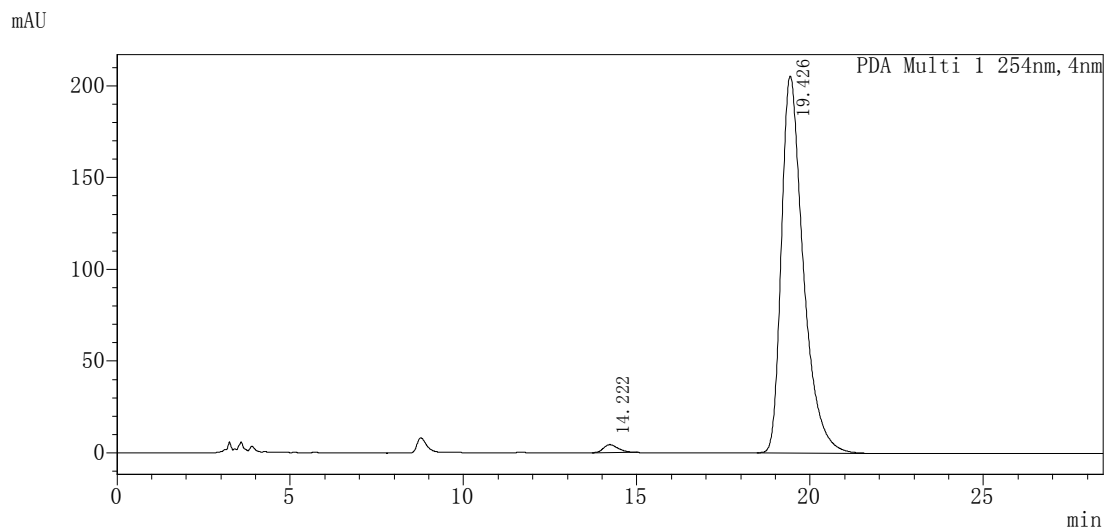

| Peak #1 | Retention Time (min) | Area    | Height | Area Percent |
|---------|----------------------|---------|--------|--------------|
| 1       | 14.222               | 127312  | 4319   | 1.391        |
| 2       | 19.426               | 9026995 | 205379 | 98.609       |

### Synthesis of compound 10

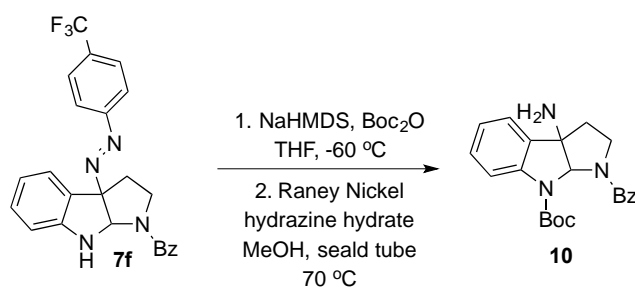

To a solution of compound **7f** (360 mg, 0.82 mmol) in THF (8 mL) was added NaHMDS (2.05 mL, 2.05 mmol, 1 M in THF) dropwise under Ar at -60 °C over 10 min. The resulting deep yellow solution was stirred for 30 min and a solution of Boc<sub>2</sub>O (268 mg, 1.23 mmol) in THF (4 mL) was added slowly at -60 °C. Then the reaction mixture was stirred at -60 °C for one hour, quenched with saturated NH<sub>4</sub>Cl aqueous solution,

and extracted with EtOAc. The organic layer was then washed with water and brine, dried over Na<sub>2</sub>SO<sub>4</sub>, concentrated and directly used without further purification.

To a solution of the above residue in MeOH (41 mL) in the sealed tube was added hydrazine hydrate (4.1 mL) and Raney Nickel (30 drops of slurry in water). After stirring at 70 °C for 24 h. The reaction was cooled down to rt, filtered and concentrated under vacuum and further purified by flash column chromatography (silica gel, DCM/MeOH = 50/1 - 20/1) to give amino compound **10** as white foam (276 mg, 88% yield over 2 steps)

<sup>1</sup>H NMR (400 MHz, CDCl<sub>3</sub>) δ 7.86 (d, *J* = 8.0 Hz, 1H), 7.60-7.53 (m, 2H), 7.49-7.33 (m, 4H), 7.33-7.27 (m, 1H), 7.07 (t, *J* = 7.6 Hz, 1H), 6.52 (s, 1H), 3.59 (dd, *J* = 11.6 Hz, 7.6 Hz, 1H), 3.19 (td, *J* = 12.4 Hz, 5.2 Hz, 1H), 2.19 (dd, *J* = 12.4 Hz, 4.8 Hz, 1H), 2.16-1.95(m, 3H); <sup>13</sup>C NMR (100 MHz, CDCl<sub>3</sub>) δ 171.0, 152.6, 143.0, 135.7, 131.1, 129.8, 128.6, 128.5, 123.8, 123.6, 115.4, 82.2, 82.1, 68.9, 49.2, 42.5, 28.6. HRMS calcd for C<sub>22</sub>H<sub>26</sub>N<sub>3</sub>O<sub>3</sub> [M+H]: 380.1974; found: 380.1976.

Reference:

Matsuda, Y.; Kitajima, M.; Takayama, H. *Org. Lett.* **2008**, *10*, 125.

### Synthesis of compound **11**

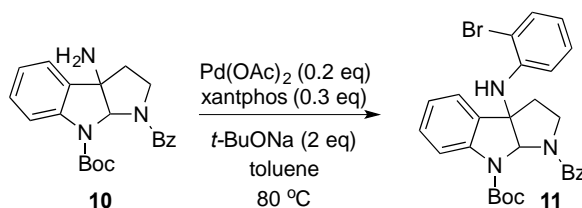

In a glovebox, a sealed tube was charged with **10** (140 mg, 0.37 mmol), 1,2-dibromobenzene (218 mg, 0.92 mmol), Pd(OAc)<sub>2</sub> (16.6 mg, 0.074 mmol), xantphos (64 mg, 0.11 mmol), *t*-BuONa (71 mg, 0.74 mmol) and toluene (7.4 mL) After stirring at 80 °C for 24 hrs, the reaction was diluted with EtOAc, filtered and washed with EtOAc. The resulting organic layer was washed with water and brine, dried over Na<sub>2</sub>SO<sub>4</sub>, concentrated under vacuum and purified by flash column chromatography (silica gel, petroleum ether/ethyl acetate = 7/1) to give compound **11** as yellow foam (139 mg, 71% yield).

$^1\text{H}$  NMR (400 MHz,  $\text{CD}_2\text{Cl}_2$ )  $\delta$  7.92 (d,  $J = 8.0$  Hz, 1H), 7.52-7.39 (m, 4H), 7.36-7.29 (m, 1H), 7.24 (d,  $J = 7.6$  Hz, 1H), 7.04 (t,  $J = 7.6$  Hz, 1H), 7.00-6.94 (m, 1H), 6.88 (s, 1H), 6.62-6.54 (m, 1H), 6.19 (dd,  $J = 8.0$  Hz, 1.0 Hz, 1H), 4.93 (s, 1H), 3.72 (dd,  $J = 11.6$  Hz, 7.6 Hz, 1H), 3.26 (td,  $J = 12.0$  Hz, 5.6 Hz, 1H), 1.47 (s, 9H);  $^{13}\text{C}$  NMR (100 MHz,  $\text{CD}_2\text{Cl}_2$ )  $\delta$  171.2, 152.2, 143.7, 142.1, 135.5, 132.8, 131.1, 130.9, 129.9, 128.5, 128.4, 123.54, 123.51, 119.2, 115.0, 113.6, 111.1, 82.1, 77.0, 71.0, 47.3, 43.6, 28.2. HRMS calcd for  $\text{C}_{28}\text{H}_{28}\text{BrN}_3\text{NaO}_3$  [ $\text{M}+\text{Na}$ ]: 556.1212; found: 556.1206.

### Synthesis of compound **9**

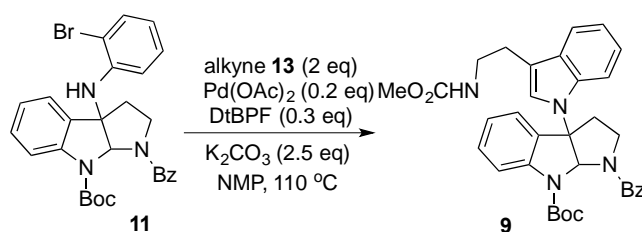

In a glovebox, a sealed tube was charged with compound **11** (137 mg, 0.26 mmol), alkyne **13** (102 mg, 0.52 mmol),  $\text{Pd}(\text{OAc})_2$  (11.5 mg, 0.052 mmol), DtBPF (36.5 mg, 0.078 mmol),  $\text{K}_2\text{CO}_3$  (89 mg, 0.66 mmol) and NMP (5.2 mL). After stirring at  $110\text{ }^\circ\text{C}$  for 24 hours, the reaction mixture was cooled down to rt, diluted with EtOAc, filtered and washed with EtOAc. The combined organic layer was washed with water and brine, dried over  $\text{Na}_2\text{SO}_4$ , concentrated under vacuum and purified by flash column chromatography (silica gel, petroleum ether/ethyl acetate = 2/1) to give compound **9** as yellow foam (124 mg, 83% yield).

$^1\text{H}$  NMR (400 MHz,  $\text{CD}_2\text{Cl}_2$ )  $\delta$  7.97 (d,  $J = 8.0$  Hz, 1H), 7.68-7.55 (m, 3H), 7.52-7.47 (m, 1H), 7.47-7.40 (m, 2H), 7.40-7.33 (m, 1H), 7.23 (s, 1H), 7.16-7.00 (m, 6H), 7.00-6.94 (m, 1H), 4.89 (s, 1H), 3.84 (dd,  $J = 11.6$  Hz, 7.2 Hz, 1H), 3.62 (s, 3H), 3.50-3.38 (m, 2H), 3.33 (td,  $J = 12.0$  Hz, 4.4 Hz, 1H), 3.02 (td,  $J = 12.0$  Hz, 7.2 Hz, 1H), 2.91 (t,  $J = 7.2$  Hz, 2H), 2.52 (dd,  $J = 12.0$  Hz, 4.4 Hz, 1H), 1.48 (s, 9H);  $^{13}\text{C}$  NMR (100 MHz,  $\text{CD}_2\text{Cl}_2$ )  $\delta$  171.2, 157.0, 152.0, 143.5, 135.8, 135.2, 131.2, 130.5, 130.0, 129.6, 128.51, 128.50, 124.2, 124.0, 123.5, 122.3, 119.8, 119.3, 115.5, 112.7, 111.3, 82.4, 78.4, 73.7, 51.9, 48.5, 41.4, 40.1, 28.1, 25.8. HRMS calcd for  $\text{C}_{34}\text{H}_{36}\text{N}_4\text{NaO}_5$  [ $\text{M}+\text{Na}$ ]: 603.2583; found: 603.2604.

Reference:

Shen, M.; Li, G.; Lu, B. Z.; Hossain, A.; Roschangar, F.; Farina, V. C.; Senanayake, H. *Org. Lett.* **2004**, *6*, 4129.

### Synthesis of compound **12**

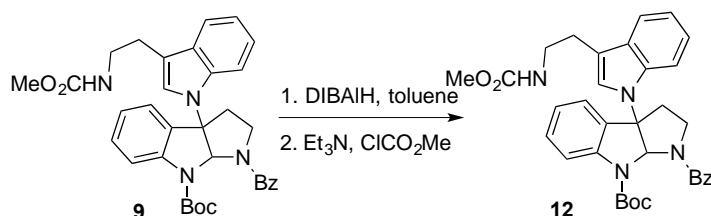

To a solution of compound **9** (102 mg, 0.18 mmol) in toluene (3.6 mL) was added DIBAL-H (0.35 mL, 0.53 mmol) dropwise at -78 °C under Argon. The reaction mixture was stirred at -78 °C until **8** was consumed completely. Then the reaction was quenched with Rochelle salt, stirred for 2 h and diluted with EtOAc. The organic layer was washed with water and brine, dried over Na<sub>2</sub>SO<sub>4</sub>, concentrated under vacuum and directly used for next step without further purification.

To a mixture of the above residue and Na<sub>2</sub>CO<sub>3</sub> (56 mg, 0.53 mmol) in DCM-H<sub>2</sub>O (3.6 mL-1.8 mL) was added ClCO<sub>2</sub>Me (50 mg, 0.53 mmol) dropwise at rt. After stirring at rt for 2 h, the mixture was diluted with DCM and H<sub>2</sub>O. Then the organic layer was washed with water and brine, dried over Na<sub>2</sub>SO<sub>4</sub>, concentrated and purified by flash column chromatography (silica gel, petroleum ether/ethyl acetate = 2/1) to give compound **12** as yellow foam (60 mg, 64% yield over 2 steps).

<sup>1</sup>H NMR (400 MHz, CD<sub>2</sub>Cl<sub>2</sub>) δ 7.82 (d, *J* = 8.4 Hz, 1H), 7.61-7.53 (m, 1H), 7.41-7.32 (m, 1H), 7.21 (d, *J* = 7.6 Hz, 1H), 7.14-7.00 (m, 5H), 6.69 (s, 1H), 4.87 (s, 1H), 4.14 (dd, *J* = 11.2 Hz, 7.2 Hz, 1H), 3.71 (s, 1H), 3.60 (s, 1H), 3.41 (d, *J* = 13.2 Hz, 6.8 Hz, 2H), 3.11 (td, *J* = 12.0 Hz, 7.6 Hz, 1H), 3.00 (td, *J* = 12.0 Hz, 4.8 Hz, 1H), 2.88 (t, *J* = 12.0 Hz, 2H), 2.57 (dd, *J* = 11.6 Hz, 4.4 Hz, 1H), 1.52 (s, 9H); <sup>13</sup>C NMR (100 MHz, CD<sub>2</sub>Cl<sub>2</sub>) δ 157.0, 155.1, 152.1, 143.3, 135.6, 130.5, 130.0, 129.9, 124.4, 124.2, 123.7, 122.2, 119.8, 119.4, 116.6, 112.5, 111.3, 82.2, 80.1, 74.2, 52.8, 51.9, 45.4, 41.4, 37.6, 28.1, 25.8. HRMS calcd for C<sub>29</sub>H<sub>34</sub>N<sub>4</sub>NaO<sub>6</sub> [M+Na]: 557.2376; found: 557.2371.

Reference:



Gutzwiller, J.; Uskokovic, M. *J. Am. Chem. Soc.* **1970**, *92*, 204.

### Synthesis of (-)-psychotrimine

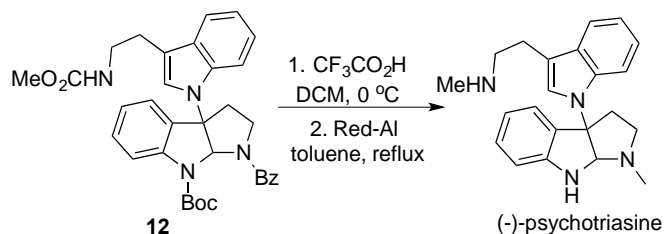

To a solution of compound **12** (70 mg, 0.13 mmol) in DCM (2.6 mL) was added CF<sub>3</sub>CO<sub>2</sub>H (1.3 mL) at 0 °C, and the mixture was stirred for one hour. Then the reaction was diluted with DCM, washed with H<sub>2</sub>O and brine, dried over Na<sub>2</sub>SO<sub>4</sub>, filtered, concentrated under vacuum and directly used for the next step without further purification.

To a solution of the above residue in toluene (2.6 mL) was added Red-Al (0.45 mL, 1.57 mmol, 3.5 M in toluene) dropwise at rt over 10 min and the mixture was heated to reflux for 1 hour. Then the reaction was quenched with Rochelle salt, stirred for 2 hours and diluted with DCM. The organic layer was washed with H<sub>2</sub>O and brine, dried over Na<sub>2</sub>SO<sub>4</sub>, filtered, concentrated under vacuum and purified by flash column chromatography (silica gel, DCM/MeOH/ammonium hydroxide = 100/5/1 to DCM/MeOH = /5/1 ) to give (-)-psychotrimine (**2**) as white foam (23 mg, 51% yield over 2 steps).

<sup>1</sup>H NMR (400 MHz, CD<sub>3</sub>OD) δ 7.52 (dd, *J* = 6.8 Hz, 1.2 Hz, 1H), 7.38 (s, 1H), 7.13 (d, *J* = 7.6 Hz, 1H), 7.05 (td, *J* = 7.6 Hz, 1.2 Hz, 1H), 7.00-6.90 (m, 2H), 6.85 (d, *J* = 7.6 Hz, 1H), 6.68 (d, *J* = 8.0 Hz, 1H), 6.56 (t, *J* = 7.6 Hz, 1H), 5.21 (s, 1H), 3.26-3.14 (m, 1H), 3.00-2.89 (m, 3H), 2.89-2.81 (m, 2H), 2.65-2.54 (m, 1H), 2.51-2.41 (m, 1H), 2.45 (s, 3H), 2.38 (s, 3H); <sup>13</sup>C NMR (100 MHz, CD<sub>3</sub>OD) δ 152.5, 137.7, 131.5, 130.9, 130.6, 125.1, 124.7, 122.4, 120.1, 119.7, 119.5, 113.05, 113.02, 110.1, 87.1, 77.5, 52.9, 52.2, 40.0, 36.4, 35.9, 25.8. HRMS calcd for C<sub>22</sub>H<sub>27</sub>N<sub>4</sub> [M+H]: 347.2236; found: 347.2232; [α]<sub>D</sub><sup>30</sup> = -138 ° (c 0.3, MeOH).

Reference:

Newhouse, T.; Baran, P. S. *J. Am. Chem. Soc.* **2008**, *130*, 10886.

## Synthesis of compound 16

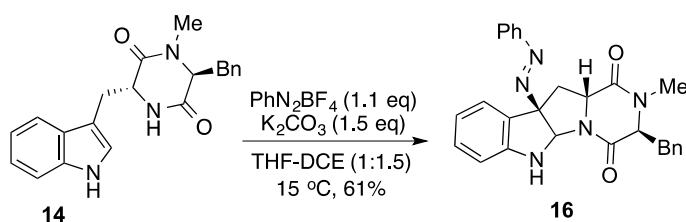

To a suspension of **14** (34.7 mg, 0.1 mmol) and  $\text{K}_2\text{CO}_3$  (20.7 mg, 0.15 mmol) in THF-DCE (1:1.5, 1 mL) was added  $\text{PhN}_2\text{BF}_4$  (21.1 mg, 0.11 mmol) in one portion at 15 °C. After stirring for 48 h at 0 °C, the reaction was diluted with EtOAc and  $\text{H}_2\text{O}$ . Then the organic layer was washed with  $\text{H}_2\text{O}$  and brine, dried over  $\text{Na}_2\text{SO}_4$ , filtered and then concentrated under vacuum and further purified by flash column chromatography (silica gel, DCM/petroleum ether/ethyl acetate = 1/1/1) to give compound **16** as yellow foam (27.5 mg, 61% yield).

$^1\text{H}$  NMR (400 MHz,  $\text{CD}_2\text{Cl}_2$ )  $\delta$  7.76-7.67 (m, 2H), 7.56-7.49 (m, 3H), 7.22-7.08 (m, 6H), 7.02 (t,  $J = 7.2$  Hz, 1H), 6.74 (t,  $J = 8.4$  Hz, 1H), 6.65 (d,  $J = 8.0$  Hz, 1H), 6.07 (s, 1H), 4.19 (t,  $J = 4.4$  Hz, 1H), 3.25 (dd,  $J = 14.0$  Hz, 4.0 Hz, 1H), 3.11 (dd,  $J = 14.0$  Hz, 4.8 Hz, 1H), 3.00-2.91 (m, 4H), 2.44 (dd,  $J = 11.6$  Hz, 6.4 Hz, 1H), 2.16 (dd,  $J = 13.2$  Hz, 12.0 Hz, 1H);  $^{13}\text{C}$  NMR (100 MHz,  $\text{CD}_2\text{Cl}_2$ )  $\delta$  166.6, 166.3, 151.5, 148.4, 135.3, 131.4, 129.85, 129.82, 129.1, 128.8, 127.8, 127.6, 124.4, 122.6, 119.3, 109.9, 87.5, 79.7, 65.9, 56.4, 39.4, 36.7, 32.2. HRMS calcd for  $\text{C}_{27}\text{H}_{26}\text{N}_5\text{O}_2$  [M+H]: 452.2087; found: 452.2096.

## Synthesis of alkyne 21

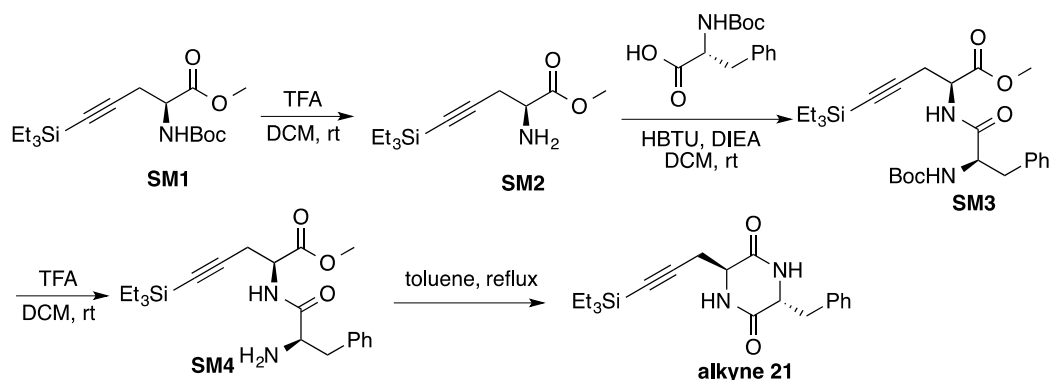

To a solution of **SM1** (3.3g, 9.7 mmol) in DCM (35 mL) was added TFA (15 mL, 195 mmol) dropwise at 0 °C, then the cooling bath was removed and the reaction mixture was left to stir overnight. The reaction was quenched by sodium hydroxide aqueous solution under 0 °C, adjusted pH to 8~9, and extracted with EtOAc (3 x 50 mL). The combined organic layer was washed with H<sub>2</sub>O and brine, dried over Na<sub>2</sub>SO<sub>4</sub>, filtered and concentrated. The residue **SM2** was used for the next step without purification.

To a solution of **SM2** (~ 9 mmol), (D)-Tyr-Boc(2.9 g, 10.9 mmol) and HBTU (4.1g, 10.9 mmol) in DCM (100 mL) was added DIEA (3 mL, 23 mmol) dropwise at 0 °C. After stirring at rt overnight, the reaction was quenched by water, extracted with EtOAc (3 x 50 mL). The combined organic layer was washed with H<sub>2</sub>O and brine, dried over Na<sub>2</sub>SO<sub>4</sub>, filtered and concentrated. The residue was then filtered through silica gel pad using EtOAc/PE(1/4) as eluent to yield **SM3** (4.3g, 98%).

To a solution of **SM3** in DCM (30 mL) was added TFA (14 mL, 180 mmol) slowly at 0 °C, then the reaction mixture was stirred at rt overnight. The reaction was quenched by sodium hydroxide aqueous solution at 0 °C, adjusted pH to 8~9, and extracted with EtOAc (3 x 50 mL). The combined organic layer was washed with H<sub>2</sub>O and brine, dried over Na<sub>2</sub>SO<sub>4</sub>, filtered and concentrated. The crude **SM4** was dissolved in toluene (130 mL) and the resulting solution was refluxed for 24 hours. The precipitated white solid was filtered and washed with toluene (3 x 20 mL) to get **alkyne 21** without further purification (2.8 g, 7.7 mmol, 80% yield).

<sup>1</sup>H NMR (400 MHz, DMSO-*d*<sub>6</sub>) δ 8.35 (s, 1H), 8.02 (s, 1H), 7.31-7.20 (m, 3H),

7.20-7.12 (m, 2H), 4.15 (m, 1H), 3.22-3.08 (m, 2H), 2.89 (dd,  $J = 13.6$  Hz, 4.8 Hz, 1H), 2.63 (dd,  $J = 17.2$  Hz, 3.2 Hz, 1H), 2.41 (dd,  $J = 17.2$  Hz, 4.8 Hz, 1H), 0.91 (t,  $J = 8.0$  Hz, 9H), 0.50 (q,  $J = 8.0$  Hz, 6H);  $^{13}\text{C}$  NMR (100 MHz, DMSO- $d_6$ )  $\delta$  166.6, 166.0, 135.8, 130.1, 128.0, 126.6, 103.9, 83.9, 38.4, 24.8, 7.2, 3.9. HRMS calcd for  $\text{C}_{20}\text{H}_{29}\text{N}_2\text{O}_2\text{Si}$  [M+H]: 357.1998; found: 357.2005.

Reference:

Newhouse, T.; Lewis, C. A.; Eastman, K. J.; Baran, P. S. *J. Am. Chem. Soc.* **2010**, *132*, 7119.

### Synthesis of Compound 18

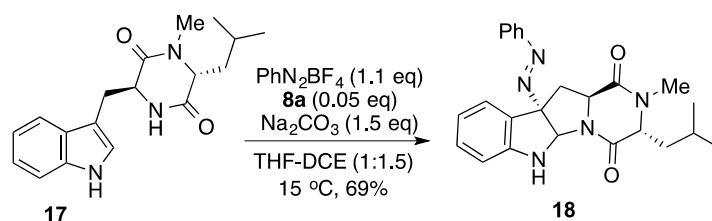

To a suspension of **17** (599 mg, 2.0 mmol), **8** (75.3 mg, 0.1 mmol) and  $\text{Na}_2\text{CO}_3$  (233.2 mg, 2.2 mmol) in DCE-THF (1.5:1, 20mL) was added  $\text{PhN}_2\text{BF}_4$  (461mg, 2.4mmol) at 0 °C. After stirring for 12 hours at 0 °C. The reaction mixture was diluted with  $\text{H}_2\text{O}$  and extracted with EtOAc three times. The combined organic layer was washed with  $\text{H}_2\text{O}$  and brine, dried over  $\text{Na}_2\text{SO}_4$ , filtered, and concentrated under vacuum. The residue was purified by flash column chromatography (silica gel, DCM/MeOH= 80/1) to give compound **18** as yellow foam (553 mg, 69% yield).

$^1\text{H}$  NMR (400 MHz,  $\text{CDCl}_3$ )  $\delta$  7.80-7.73 (m, 2H), 7.59 (d,  $J = 4.0$  Hz, 1H), 7.51-7.43 (m, 3H), 7.27 (d,  $J = 7.2$  Hz, 1H), 7.16 (td,  $J = 8.0$  Hz, 1.2 Hz, 1H), 6.78 (td,  $J = 7.6$  Hz, 0.4 Hz, 1H), 6.68 (d,  $J = 8.0$  Hz, 1H), 6.29 (d,  $J = 4.0$  Hz, 1H), 5.74 (d,  $J = 4.0$  Hz, 1H), 4.23 (dd,  $J = 11.2$  Hz, 6.8 Hz, 1H), 4.03-3.90 (m, 1H), 3.30 (dd,  $J = 13.6$  Hz, 6.8 Hz, 1H), 2.53 (dd,  $J = 13.6$  Hz, 11.2 Hz, 1H), 1.86-1.74 (m, 1H), 1.70-1.60 (m, 2H);  $^{13}\text{C}$  NMR (100 MHz,  $\text{CDCl}_3$ )  $\delta$  169.2, 168.0, 151.4, 148.2, 131.7, 130.1, 129.3, 127.6, 124.3, 122.9, 119.5, 110.4, 87.5, 80.8, 57.2, 56.3, 42.5, 38.9, 24.5, 23.3, 21.4. HRMS calcd for  $\text{C}_{23}\text{H}_{26}\text{N}_5\text{O}_2$  [M+H]: 404.2087; found: 404.2076.

Reference:

### Synthesis of compound **19**

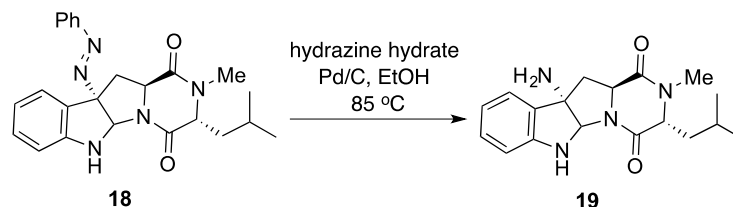

A mixture of **18** (101 mg, 0.25 mmol), 10 wt. % Pd/C (133 mg, 0.5 mmol) and hydrazine hydrate (125  $\mu$ L, 2.5 mmol) in ethanol (4 mL) was stirred for 1 hour at 85 °C. Then the mixture was filtered through celite, washed with ethyl alcohol and concentrated. The residue was purified by flash column chromatography (silica gel, DCM/MeOH = 40/1) to give compound **19** as a white solid. (63 mg, 80% yield)

$^1\text{H}$  NMR (400 MHz, DMSO-*d*6)  $\delta$  8.41 (d,  $J$  = 4.4 Hz, 1H), 7.20 (d,  $J$  = 7.2 Hz, 1H), 6.98 (t,  $J$  = 7.6 Hz, 1HG), 6.62 (t,  $J$  = 7.6 Hz, 1H), 6.56 (d,  $J$  = 4.0 Hz, 1H), 6.49 (d,  $J$  = 8.0 Hz, 1H), 5.21 (d,  $J$  = 4.0 Hz, 1H), 4.64 (dd,  $J$  = 11.2 Hz, 6.4 Hz, 1H), 3.74-3.64 (m, 1H), 2.44 (brs, 2H), 2.29 (dd,  $J$  = 12.8 Hz, 6.4 Hz, 1H), 1.81-1.61 (m, 3H), 1.53-1.42 (m, 1H), 0.95 (d,  $J$  = 6.4 Hz, 3H), 0.91 (d,  $J$  = 6.4 Hz, 3H);  $^{13}\text{C}$  NMR (100 MHz, DMSO-*d*6)  $\delta$  169.1, 167.6, 147.9, 133.7, 128.2, 122.1, 117.6, 109.3, 84.9, 67.9, 57.4, 55.3, 42.4, 41.6, 23.9, 22.9, 21.4. HRMS calcd for  $\text{C}_{17}\text{H}_{23}\text{N}_4\text{O}_2$  [M+H]: 315.1821; found: 315.1832.

### Synthesis of compound **20**

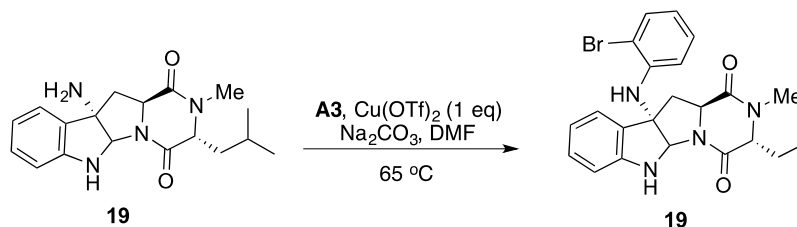

To an oven-dried sealed tube was charged with **19** (31.4 mg, 0.1 mmol), **A3** (275.5 mg, 0.5 mmol),  $\text{Cu}(\text{OTf})_2$  (36.2 mg, 0.1 mmol),  $\text{Na}_2\text{CO}_3$  (21.1 mg, 0.2 mmol) and DMF (1.4 mL) in a glovebox. After stirring at 65 °C under  $\text{N}_2$  for 12 hours, the reaction was quenched by  $\text{H}_2\text{O}$  and extracted by EtOAc. The combined organic layer was washed

with H<sub>2</sub>O and brine, dried over Na<sub>2</sub>SO<sub>4</sub>, filtered and concentrated under vacuum. The residue was purified by flash column chromatography (silica gel, acetone/petroleum = 1/2) to give compound **20** as a pale yellow solid (21.3 mg, 45% yield).

<sup>1</sup>H NMR (400 MHz, CDCl<sub>3</sub>) δ 7.43 (d, *J* = 8.0 Hz, 1H), 7.15 (t, *J* = 8.0 Hz, 1H), 7.10 (d, *J* = 7.2 Hz, 1H), 6.91 (t, *J* = 7.6 Hz, 1H), 6.74 (t, *J* = 7.6 Hz, 1H), 6.66 (d, *J* = 8.0 Hz, 1H), 6.62-6.53 (m, 2H), 6.16 (d, *J* = 8.4 Hz, 1H), 5.96 (d, *J* = 4.0 Hz, 1H), 5.44 (d, *J* = 3.6 Hz, 1H), 4.86 (s, 1H), 4.63 (dd, *J* = 12.0 Hz, 6.0 Hz, 1H), 4.01-3.92 (m, 1H), 2.82 (dd, *J* = 14.0 Hz, 6.0 Hz, 1H), 2.50 (dd, *J* = 13.6 Hz, 12.0 Hz, 1H), 1.86-1.74 (m, 1H), 1.67 (t, *J* = 7.2 Hz, 2H), 1.00 (d, *J* = 6.4 Hz, 3H), 0.96 (d, *J* = 6.4 Hz, 3H); <sup>13</sup>C NMR (100 MHz, CDCl<sub>3</sub>) δ 169.2, 168.0, 151.4, 148.2, 131.7, 130.1, 129.3, 127.6, 124.3, 122.9, 119.5, 110.4, 87.5, 80.8, 57.2, 56.3, 42.5, 38.9, 24.5, 23.3, 21.4. HRMS calcd for C<sub>23</sub>H<sub>25</sub>N<sub>4</sub>O<sub>2</sub>NaBr [M+Na]: 491.1059; found: 491.1061.

Reference:

(a) Ley, S. V.; Thomas, A. W.; *Angew. Chem. Int. Ed.* **2003**, *42*, 5400;

(b) Shafir, A. P.; Lichtor, A.; Buchwald, S. L. *J. Am. Chem. Soc.* **2007**, *129*, 3490.

#### Synthesis of (+)-pestalazine B (**4**)

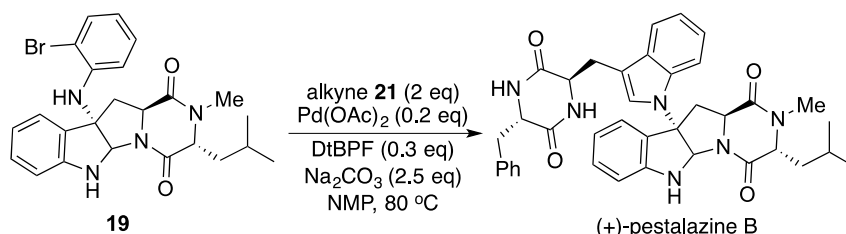

In a glovebox, a sealed tube was charged with compound **19** (70.4 mg, 0.15 mmol), alkyne **21** (107 mg, 0.30 mmol), Pd(OAc)<sub>2</sub> (6.7 mg, 0.030 mmol), DtBPF (21.3 mg, 0.045 mmol), Na<sub>2</sub>CO<sub>3</sub> (39.8 mg, 0.37 mmol), and NMP (2.1 mL). After stirring at 80 °C for 3 hours. The reaction mixture was cooled down to rt, diluted with EtOAc, filtered and washed with EtOAc. The resulting organic layer was stirred with 2 M HCl vigorously, washed with water and brine, dried over Na<sub>2</sub>SO<sub>4</sub>, concentrated and purified by flash column chromatography (silica gel, petroleum ether/acetone = 2/1 to 1.5/1) to give (+)-pestalazine B (**4**) as white solid (51.7 mg, 57% yield).

<sup>1</sup>H NMR (600 MHz, acetone-*d*<sub>6</sub>) δ 7.69-7.61 (m, 2H), 7.53-7.48 (m, 1H), 7.25-

7.15 (m, 4H), 7.12-7.06 (m, 2H), 7.00-6.90 (m, 4H), 6.85 (dt,  $J = 5.2$  Hz, 0.4 Hz, 1H), 6.79 (dt,  $J = 5.6$  Hz, 0.8 Hz, 1H), 6.76 (s, 1H), 6.64 (td,  $J = 5.6$  Hz, 0.8 Hz, 1H), 6.58 (d,  $J = 2.4$  Hz, 1H), 6.05 (d,  $J = 4$  Hz, 1H), 4.85 (dd,  $J = 4$  Hz, 7.6Hz, 1H), 3.91 (quint,  $J = 3.2$  Hz, 1H), 3.72-3.65 (m, 2H), 3.51 (t,  $J = 3.6$  Hz, 1H), 3.23, (d,  $J = 3.6$  Hz, 2H), 3.05 (dd,  $J = 9.2$  Hz, 3.6 Hz, 1H), 2.99 (dd,  $J = 9.2$  Hz, 3.2 Hz, 1H), 2.47 (dd,  $J = 10.0$  Hz, 8.0 Hz, 1H), 1.75-1.67 (m, 1H), 1.58-1.47 (m, 1H), 0.95 (d,  $J = 4.4$  Hz, 3H), 0.90 (d,  $J = 4.4$  Hz):  $^{13}\text{C}$  NMR (150 MHz, acetone- $d_6$ )  $\delta$  168.9, 168.52, 168.49, 148.8, 137.0, 136.6, 130.8, 130.7, 129.8, 129.1, 127.6, 126.48, 126.45, 123.5, 122.4, 120.5, 120.27, 120.26, 119.7, 112.9, 111.0, 83.4, 76.4, 57.30, 57.26, 56.2, 55.8, 25.1, 23.2, 21.8. HRMS calcd for  $\text{C}_{37}\text{H}_{39}\text{N}_6\text{O}_4$  [M+1]: 631.3033; found: 631.3007.  $[\alpha]_{\text{D}}^{25} = +204$  °(c 0.2, MeOH).

Reference:

Shen, M.; Li, G.; Lu, B. Z.; Hossain, A.; Roschangar, F.; Farina, V. C.; Senanayake, H. *Org. Lett.* **2004**, *6*, 4129.

Thermal ellipsoid plot of the X-ray structure of compound **16** at the 50% probability level.

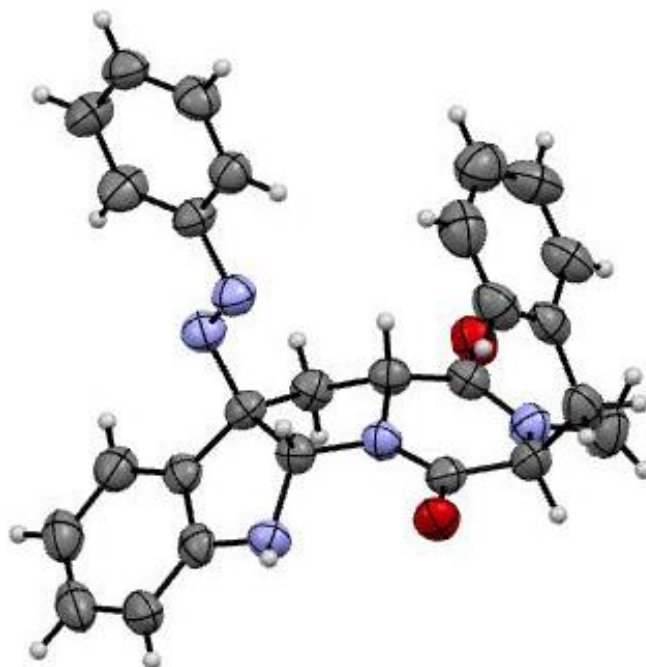

Table 1. Details of Data Collection, Processing and Structure Refinement

|                      |                                                                                                                                                                                                                    |
|----------------------|--------------------------------------------------------------------------------------------------------------------------------------------------------------------------------------------------------------------|
| Sample code          | <b>LiaoXB-1</b>                                                                                                                                                                                                    |
| Molecular formula    | $C_{27}H_{25}N_5O_2$                                                                                                                                                                                               |
| Molecular weight     | 451.52                                                                                                                                                                                                             |
| Color and habit      | yellow prism                                                                                                                                                                                                       |
| Crystal size         | $0.3 \times 0.3 \times 0.6$ mm                                                                                                                                                                                     |
| Crystal system       | orthorhombic                                                                                                                                                                                                       |
| Space group          | $P2_12_12_1$ (No. 19)                                                                                                                                                                                              |
| Unit cell parameters | $a = 11.295(5) \text{ \AA}$ $\alpha = 90.00^\circ$<br>$b = 12.390(4) \text{ \AA}$ $\beta = 90.00^\circ$<br>$c = 16.088(3) \text{ \AA}$ $\gamma = 90.00^\circ$<br>$V = 2251.5(13) \text{ \AA}^3$ $Z = 4$ $F(000) =$ |
| 952                  |                                                                                                                                                                                                                    |
| Density (calcd)      | $1.332 \text{ g/cm}^3$                                                                                                                                                                                             |
| Diffractometer       | Bruker P4                                                                                                                                                                                                          |
| Radiation            | graphite-monochromatized Mo $K_\alpha$ , $\lambda = 0.71073 \text{ \AA}$                                                                                                                                           |
| Temperature          | $295 \pm 2 \text{ K}$                                                                                                                                                                                              |



|                                                                                        |                                                                         |                            |
|----------------------------------------------------------------------------------------|-------------------------------------------------------------------------|----------------------------|
| Scan type                                                                              | ω-scan                                                                  |                            |
| Data collection range                                                                  | $-1 < h < 13, -1 < k < 15, -19 < l < 1; \theta_{\max} = 25.5^\circ$     |                            |
| Reflections measured<br>2321                                                           | Total: 3065 Unique ( <i>n</i> ): 2882 Observed [ $I \geq 2\sigma(I)$ ]: |                            |
| Absorption coefficient                                                                 | 0.087 mm <sup>-1</sup>                                                  |                            |
| No. of variables, <i>p</i>                                                             | 312                                                                     |                            |
| Weighting scheme                                                                       | $w = \frac{1}{\sigma^2(F_o^2) + (0.001P)^2 + 1.0P}$                     | $P = (F_o^2 + 2F_c^2)/3$   |
| $R1 = \frac{\sum   F_o  -  F_c  }{\sum  F_o }$ (for all reflections)                   | 0.0602                                                                  | 0.0412 (for observed data) |
| $wR2 = \sqrt{\frac{\sum [w(F_o^2 - F_c^2)^2]}{\sum w(F_o^2)^2}}$ (for all reflections) | 0.0849                                                                  | 0.0739 (for observed data) |
| Goof = $S = \sqrt{\frac{\sum [w(F_o^2 - F_c^2)^2]}{n - p}}$                            | 1.038                                                                   |                            |
| Largest and mean $\Delta/\sigma$                                                       | 0.001, 0.000                                                            |                            |
| Residual extrema in final difference map                                               | -0.213 to 0.158 e Å <sup>-3</sup>                                       |                            |

---

Table 2. Atomic coordinates and equivalent isotropic temperature factors\* ( $\text{\AA}^2$ )

| Atoms | <i>x</i>    | <i>y</i>    | <i>z</i>    | $U_{eq.}$  |
|-------|-------------|-------------|-------------|------------|
| O(1)  | 0.00152(15) | 0.46553(15) | 0.88800(11) | 0.0544(5)  |
| O(2)  | 0.23937(17) | 0.46238(16) | 0.60063(10) | 0.0590(5)  |
| N(1)  | 0.17082(18) | 0.49082(16) | 0.81727(12) | 0.0450(5)  |
| N(2)  | 0.06593(19) | 0.44633(19) | 0.66860(13) | 0.0531(6)  |
| N(3)  | 0.18768(19) | 0.63507(18) | 0.91949(13) | 0.0483(6)  |
| N(4)  | 0.4621(2)   | 0.50540(17) | 0.86669(13) | 0.0505(6)  |
| N(5)  | 0.43884(19) | 0.41377(17) | 0.88923(14) | 0.0522(6)  |
| C(1)  | 0.0568(2)   | 0.4602(2)   | 0.82334(16) | 0.0452(6)  |
| C(2)  | -0.0010(2)  | 0.4221(2)   | 0.74388(17) | 0.0529(7)  |
| C(3)  | 0.1841(2)   | 0.4582(2)   | 0.66549(16) | 0.0471(7)  |
| C(4)  | 0.2468(2)   | 0.4670(2)   | 0.74689(14) | 0.0429(6)  |
| C(5)  | 0.3349(2)   | 0.5593(2)   | 0.75160(15) | 0.0470(6)  |
| C(6)  | 0.3572(2)   | 0.5710(2)   | 0.84568(15) | 0.0428(6)  |
| C(7)  | 0.2374(2)   | 0.5362(2)   | 0.88653(15) | 0.0430(6)  |
| C(8)  | 0.3739(2)   | 0.6830(2)   | 0.87710(15) | 0.0439(6)  |
| C(9)  | 0.2763(2)   | 0.7133(2)   | 0.92328(15) | 0.0468(7)  |
| C(10) | 0.2730(3)   | 0.8116(2)   | 0.96417(17) | 0.0589(8)  |
| C(11) | 0.3693(3)   | 0.8794(2)   | 0.95676(19) | 0.0668(9)  |
| C(12) | 0.4651(3)   | 0.8517(2)   | 0.90863(19) | 0.0652(9)  |
| C(13) | 0.4687(3)   | 0.7531(2)   | 0.86867(18) | 0.0585(8)  |
| C(14) | -0.0325(2)  | 0.3022(2)   | 0.75096(19) | 0.0600(8)  |
| C(15) | 0.0728(2)   | 0.2309(2)   | 0.75988(17) | 0.0512(7)  |
| C(16) | 0.1154(3)   | 0.2017(2)   | 0.83635(18) | 0.0635(8)  |
| C(17) | 0.2162(3)   | 0.1408(3)   | 0.8438(2)   | 0.0779(10) |
| C(18) | 0.2761(3)   | 0.1086(3)   | 0.7745(2)   | 0.0784(10) |
| C(19) | 0.2352(3)   | 0.1369(2)   | 0.6984(2)   | 0.0756(10) |
| C(20) | 0.1342(3)   | 0.1966(2)   | 0.69049(18) | 0.0628(9)  |
| C(21) | 0.0032(3)   | 0.4389(3)   | 0.58915(18) | 0.0752(10) |
| C(22) | 0.5410(2)   | 0.3487(2)   | 0.90803(16) | 0.0475(7)  |
| C(23) | 0.5187(3)   | 0.2436(2)   | 0.92742(16) | 0.0513(7)  |
| C(24) | 0.6095(3)   | 0.1750(2)   | 0.94758(17) | 0.0576(8)  |
| C(25) | 0.7238(3)   | 0.2133(2)   | 0.94922(17) | 0.0553(8)  |
| C(26) | 0.7461(3)   | 0.3180(2)   | 0.93043(18) | 0.0583(8)  |
| C(27) | 0.6555(2)   | 0.3864(2)   | 0.90993(19) | 0.0617(9)  |

\* $U_{eq.}$  defined as one third of the trace of the orthogonalized **U** tensor.

Table 3. Bond lengths (Å) and bond angles (°)

|                 |            |                   |            |
|-----------------|------------|-------------------|------------|
| O(1)-C(1)       | 1.215(3)   | C(8)-C(9)         | 1.381(4)   |
| O(2)-C(3)       | 1.217(3)   | C(8)-C(13)        | 1.386(4)   |
| N(1)-C(1)       | 1.346(3)   | C(9)-C(10)        | 1.385(4)   |
| N(1)-C(4)       | 1.451(3)   | C(10)-C(11)       | 1.379(4)   |
| N(1)-C(7)       | 1.458(3)   | C(11)-C(12)       | 1.375(4)   |
| N(2)-C(3)       | 1.344(3)   | C(12)-C(13)       | 1.381(4)   |
| N(2)-C(2)       | 1.459(3)   | C(14)-C(15)       | 1.488(4)   |
| N(2)-C(21)      | 1.464(3)   | C(15)-C(16)       | 1.370(4)   |
| N(3)-C(9)       | 1.395(3)   | C(15)-C(20)       | 1.381(4)   |
| N(3)-C(7)       | 1.448(3)   | C(16)-C(17)       | 1.372(4)   |
| N(4)-N(5)       | 1.221(3)   | C(17)-C(18)       | 1.364(5)   |
| N(4)-C(6)       | 1.476(3)   | C(18)-C(19)       | 1.353(5)   |
| N(5)-C(22)      | 1.440(3)   | C(19)-C(20)       | 1.365(4)   |
| C(1)-C(2)       | 1.512(4)   | C(22)-C(23)       | 1.363(4)   |
| C(2)-C(14)      | 1.531(4)   | C(22)-C(27)       | 1.375(4)   |
| C(3)-C(4)       | 1.493(3)   | C(23)-C(24)       | 1.371(4)   |
| C(4)-C(5)       | 1.517(3)   | C(24)-C(25)       | 1.376(4)   |
| C(5)-C(6)       | 1.541(3)   | C(25)-C(26)       | 1.356(4)   |
| C(6)-C(8)       | 1.489(3)   | C(26)-C(27)       | 1.369(4)   |
| C(6)-C(7)       | 1.565(3)   |                   |            |
| C(1)-N(1)-C(4)  | 124.4(2)   | C(3)-C(4)-C(5)    | 114.2(2)   |
| C(1)-N(1)-C(7)  | 123.2(2)   | C(4)-C(5)-C(6)    | 103.1(2)   |
| C(4)-N(1)-C(7)  | 111.68(19) | N(4)-C(6)-C(8)    | 109.5(2)   |
| C(3)-N(2)-C(2)  | 124.6(2)   | N(4)-C(6)-C(5)    | 107.7(2)   |
| C(3)-N(2)-C(21) | 117.1(2)   | C(8)-C(6)-C(5)    | 116.2(2)   |
| C(2)-N(2)-C(21) | 117.4(2)   | N(4)-C(6)-C(7)    | 116.53(19) |
| C(9)-N(3)-C(7)  | 109.0(2)   | C(8)-C(6)-C(7)    | 102.9(2)   |
| N(5)-N(4)-C(6)  | 114.0(2)   | C(5)-C(6)-C(7)    | 104.2(2)   |
| N(4)-N(5)-C(22) | 114.2(2)   | N(3)-C(7)-N(1)    | 114.0(2)   |
| O(1)-C(1)-N(1)  | 122.6(2)   | N(3)-C(7)-C(6)    | 104.9(2)   |
| O(1)-C(1)-C(2)  | 121.2(2)   | N(1)-C(7)-C(6)    | 103.38(19) |
| N(1)-C(1)-C(2)  | 116.1(2)   | C(9)-C(8)-C(13)   | 119.9(2)   |
| N(2)-C(2)-C(1)  | 114.4(2)   | C(9)-C(8)-C(6)    | 109.6(2)   |
| N(2)-C(2)-C(14) | 112.4(2)   | C(13)-C(8)-C(6)   | 130.4(3)   |
| C(1)-C(2)-C(14) | 109.9(2)   | C(8)-C(9)-C(10)   | 121.1(3)   |
| O(2)-C(3)-N(2)  | 123.1(3)   | C(8)-C(9)-N(3)    | 111.1(2)   |
| O(2)-C(3)-C(4)  | 120.4(2)   | C(10)-C(9)-N(3)   | 127.8(3)   |
| N(2)-C(3)-C(4)  | 116.5(2)   | C(11)-C(10)-C(9)  | 118.3(3)   |
| N(1)-C(4)-C(3)  | 114.7(2)   | C(12)-C(11)-C(10) | 121.2(3)   |
| N(1)-C(4)-C(5)  | 101.30(19) | C(11)-C(12)-C(13) | 120.4(3)   |

(Table 3. continued)

|                           |          |                                |          |
|---------------------------|----------|--------------------------------|----------|
| C(12)-C(13)-C(8)          | 119.1(3) | C(19)-C(20)-C(15)              | 120.7(3) |
| C(15)-C(14)-C(2)          | 113.4(2) | C(23)-C(22)-C(27)              | 119.5(3) |
| C(16)-C(15)-C(20)         | 117.9(3) | C(23)-C(22)-N(5)               | 115.8(2) |
| C(16)-C(15)-C(14)         | 121.6(3) | C(27)-C(22)-N(5)               | 124.7(2) |
| C(20)-C(15)-C(14)         | 120.4(3) | C(22)-C(23)-C(24)              | 120.6(3) |
| C(15)-C(16)-C(17)         | 121.0(3) | C(23)-C(24)-C(25)              | 119.5(3) |
| C(18)-C(17)-C(16)         | 120.0(3) | C(26)-C(25)-C(24)              | 120.0(3) |
| C(19)-C(18)-C(17)         | 119.7(3) | C(25)-C(26)-C(27)              | 120.5(3) |
| C(18)-C(19)-C(20)         | 120.6(3) | C(26)-C(27)-C(22)              | 119.9(3) |
| Hydrogen bonding          |          |                                |          |
| H(3)···O(2) <sup>#1</sup> | 2.73(3)  | N(3)-H(3)···O(2) <sup>#1</sup> | 122(2)   |

Symmetry transformation code: #1 (0.5-x, 1-y, 0.5+z).

Table 4. Anisotropic thermal parameters\* ( $\text{\AA}^2$ )

| Atoms | $U_{11}$   | $U_{22}$   | $U_{33}$   | $U_{23}$    | $U_{13}$    | $U_{12}$    |
|-------|------------|------------|------------|-------------|-------------|-------------|
| O(1)  | 0.0484(10) | 0.0621(11) | 0.0528(10) | -0.0053(10) | 0.0149(9)   | -0.0042(10) |
| O(2)  | 0.0682(12) | 0.0665(12) | 0.0422(9)  | -0.0041(10) | 0.0093(10)  | -0.0087(12) |
| N(1)  | 0.0431(11) | 0.0491(12) | 0.0428(11) | -0.0069(10) | 0.0045(10)  | -0.0013(11) |
| N(2)  | 0.0505(12) | 0.0648(14) | 0.0439(11) | -0.0031(12) | -0.0029(11) | 0.0020(12)  |
| N(3)  | 0.0487(12) | 0.0528(12) | 0.0434(11) | -0.0042(11) | 0.0056(10)  | 0.0024(12)  |
| N(4)  | 0.0514(12) | 0.0490(13) | 0.0510(12) | 0.0047(11)  | -0.0003(11) | 0.0039(12)  |
| N(5)  | 0.0491(12) | 0.0477(12) | 0.0597(13) | 0.0025(12)  | -0.0018(12) | 0.0033(12)  |
| C(1)  | 0.0419(13) | 0.0435(14) | 0.0504(14) | 0.0002(13)  | 0.0018(13)  | 0.0042(13)  |
| C(2)  | 0.0438(13) | 0.0601(16) | 0.0548(15) | -0.0106(14) | -0.0026(15) | 0.0049(14)  |
| C(3)  | 0.0532(15) | 0.0412(13) | 0.0470(14) | -0.0028(13) | 0.0028(14)  | 0.0005(14)  |
| C(4)  | 0.0444(13) | 0.0451(13) | 0.0394(12) | 0.0007(12)  | 0.0053(13)  | 0.0017(13)  |
| C(5)  | 0.0467(13) | 0.0506(14) | 0.0438(13) | 0.0021(13)  | 0.0040(13)  | -0.0015(13) |
| C(6)  | 0.0385(13) | 0.0463(14) | 0.0435(13) | 0.0051(12)  | 0.0001(12)  | 0.0027(12)  |
| C(7)  | 0.0451(13) | 0.0443(13) | 0.0397(12) | 0.0014(12)  | 0.0005(12)  | 0.0005(13)  |
| C(8)  | 0.0457(14) | 0.0434(13) | 0.0426(13) | 0.0031(12)  | -0.0067(13) | 0.0015(13)  |
| C(9)  | 0.0517(15) | 0.0509(15) | 0.0378(13) | 0.0012(12)  | -0.0122(13) | -0.0002(14) |
| C(10) | 0.0627(18) | 0.0607(17) | 0.0534(15) | -0.0141(15) | -0.0122(15) | 0.0076(17)  |
| C(11) | 0.082(2)   | 0.0508(16) | 0.0676(18) | -0.0052(16) | -0.0257(18) | -0.0044(19) |
| C(12) | 0.0662(18) | 0.0554(17) | 0.0741(19) | -0.0007(16) | -0.0139(18) | -0.0146(17) |
| C(13) | 0.0517(16) | 0.0576(16) | 0.0661(18) | 0.0040(15)  | -0.0044(16) | -0.0010(16) |
| C(14) | 0.0510(15) | 0.0663(17) | 0.0626(16) | -0.0148(16) | 0.0097(17)  | -0.0137(15) |
| C(15) | 0.0554(15) | 0.0432(14) | 0.0550(15) | -0.0096(13) | 0.0079(15)  | -0.0114(13) |
| C(16) | 0.0732(19) | 0.0645(18) | 0.0529(16) | -0.0117(16) | 0.0112(17)  | -0.0056(18) |
| C(17) | 0.086(2)   | 0.076(2)   | 0.071(2)   | -0.0010(19) | -0.013(2)   | -0.010(2)   |
| C(18) | 0.0642(19) | 0.068(2)   | 0.103(3)   | -0.001(2)   | 0.004(2)    | -0.0010(18) |
| C(19) | 0.087(2)   | 0.0583(18) | 0.081(2)   | -0.0070(18) | 0.027(2)    | 0.008(2)    |
| C(20) | 0.084(2)   | 0.0495(16) | 0.0547(16) | -0.0047(14) | 0.0152(18)  | -0.0022(18) |
| C(21) | 0.068(2)   | 0.099(2)   | 0.0580(17) | -0.0104(18) | -0.0181(17) | 0.001(2)    |
| C(22) | 0.0435(14) | 0.0459(14) | 0.0531(15) | 0.0050(13)  | -0.0004(13) | 0.0065(13)  |
| C(23) | 0.0476(15) | 0.0514(15) | 0.0547(16) | 0.0012(14)  | -0.0005(14) | -0.0005(15) |
| C(24) | 0.0694(19) | 0.0440(15) | 0.0596(17) | 0.0041(14)  | -0.0035(17) | 0.0020(15)  |
| C(25) | 0.0552(17) | 0.0566(17) | 0.0540(16) | -0.0009(14) | -0.0028(15) | 0.0144(15)  |
| C(26) | 0.0437(15) | 0.0633(17) | 0.0678(18) | 0.0097(16)  | 0.0008(15)  | 0.0062(16)  |
| C(27) | 0.0571(17) | 0.0471(15) | 0.081(2)   | 0.0175(16)  | -0.0005(17) | -0.0021(15) |

\*The exponent takes the form:  $-2\pi^2 \sum \sum U_{ij} h_i h_j \mathbf{a}_i^* \mathbf{a}_j^*$

Table 5. Coordinates and isotropic temperature factors\* ( $\text{\AA}^2$ ) for H atoms

| Atoms  | <i>x</i> | <i>y</i> | <i>z</i>   | $U_{eq.}$ |
|--------|----------|----------|------------|-----------|
| H(3)   | 0.151(2) | 0.620(2) | 0.9638(16) | 0.058     |
| H(2)   | -0.0762  | 0.4612   | 0.7393     | 0.063     |
| H(4)   | 0.2887   | 0.3992   | 0.7577     | 0.052     |
| H(5A)  | 0.3018   | 0.6250   | 0.7285     | 0.056     |
| H(5B)  | 0.4074   | 0.5417   | 0.7223     | 0.056     |
| H(7)   | 0.2500   | 0.4827   | 0.9305     | 0.052     |
| H(10)  | 0.2076   | 0.8314   | 0.9958     | 0.071     |
| H(11)  | 0.3693   | 0.9450   | 0.9848     | 0.080     |
| H(12)  | 0.5280   | 0.8996   | 0.9029     | 0.078     |
| H(13)  | 0.5339   | 0.7340   | 0.8365     | 0.070     |
| H(14A) | -0.0838  | 0.2920   | 0.7987     | 0.072     |
| H(14B) | -0.0763  | 0.2807   | 0.7018     | 0.072     |
| H(16)  | 0.0753   | 0.2236   | 0.8840     | 0.076     |
| H(17)  | 0.2438   | 0.1214   | 0.8962     | 0.093     |
| H(18)  | 0.3446   | 0.0675   | 0.7794     | 0.094     |
| H(19)  | 0.2763   | 0.1154   | 0.6512     | 0.091     |
| H(20)  | 0.1065   | 0.2143   | 0.6378     | 0.075     |
| H(21A) | 0.0255   | 0.3734   | 0.5613     | 0.113     |
| H(21B) | 0.0236   | 0.4997   | 0.5550     | 0.113     |
| H(21C) | -0.0806  | 0.4387   | 0.5990     | 0.113     |
| H(23)  | 0.4412   | 0.2182   | 0.9270     | 0.062     |
| H(24)  | 0.5939   | 0.1031   | 0.9600     | 0.069     |
| H(25)  | 0.7858   | 0.1674   | 0.9632     | 0.066     |
| H(26)  | 0.8235   | 0.3435   | 0.9315     | 0.070     |
| H(27)  | 0.6714   | 0.4582   | 0.8973     | 0.074     |

\*The exponent takes the form:  $-8\pi^2 U \sin^2\theta/\lambda^2$

# CD spectra of Pestalazine B

file : liq1-MeOH-TM00064 200 S.dsx  
property : Circular Dichroism

Wednesday, September 24, 2014

1

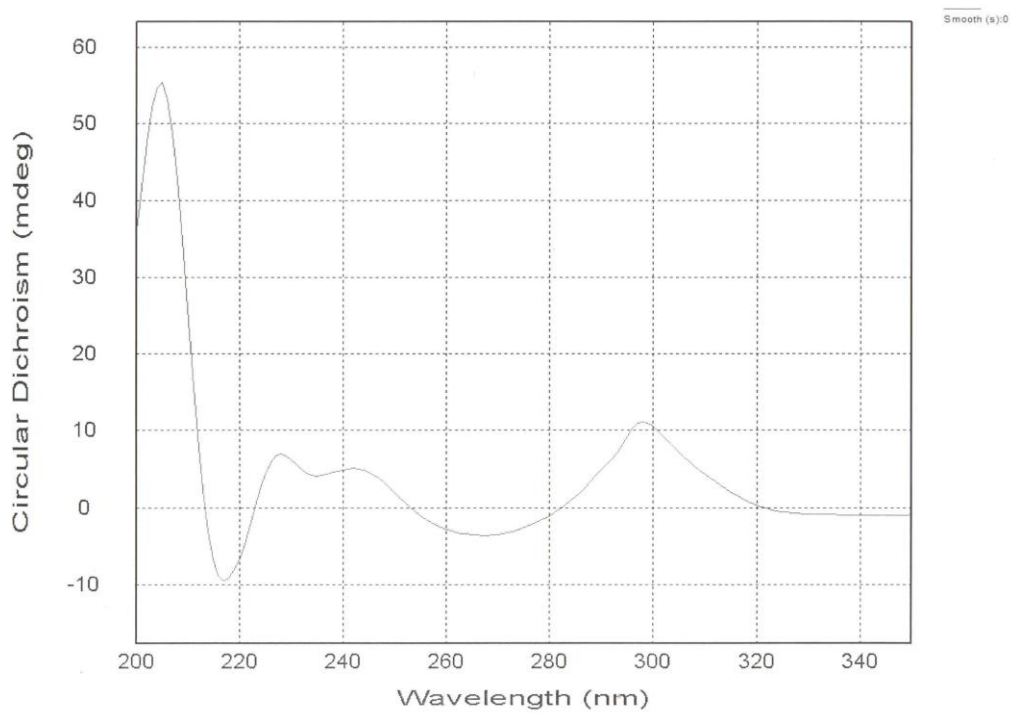

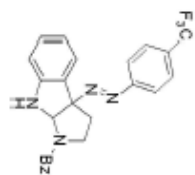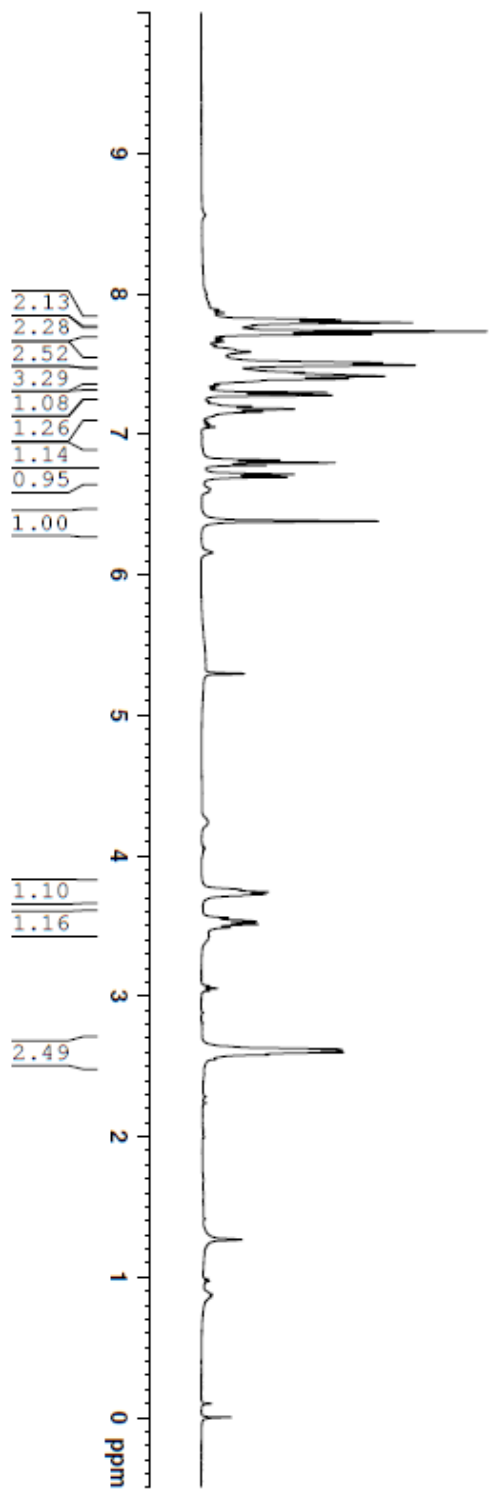



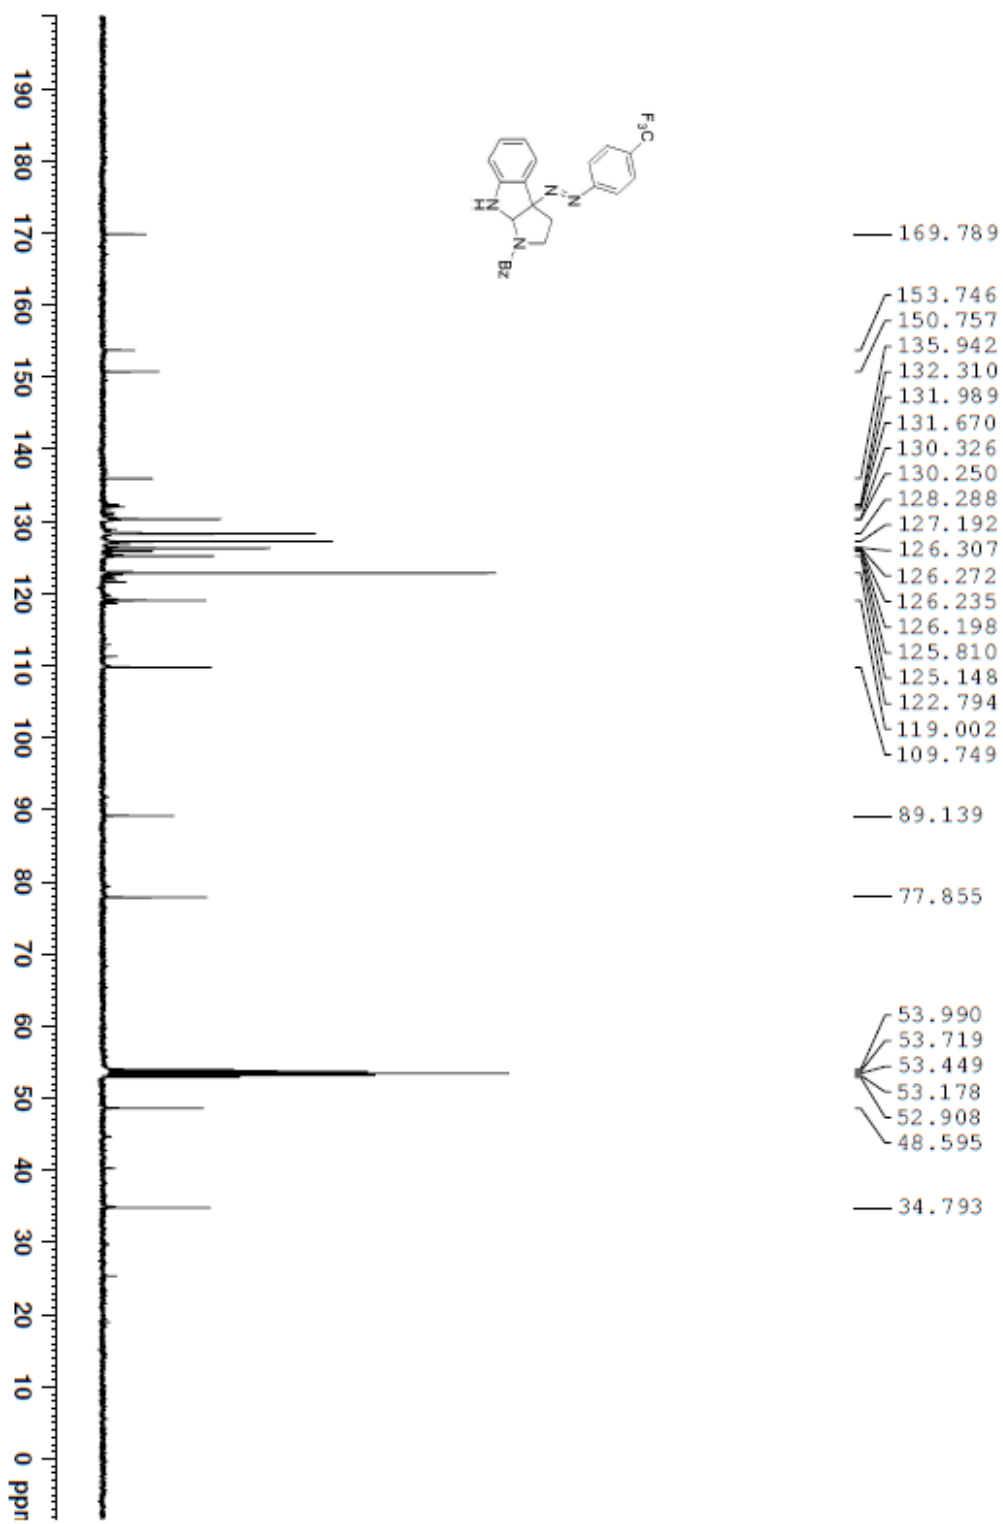

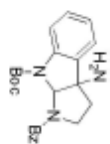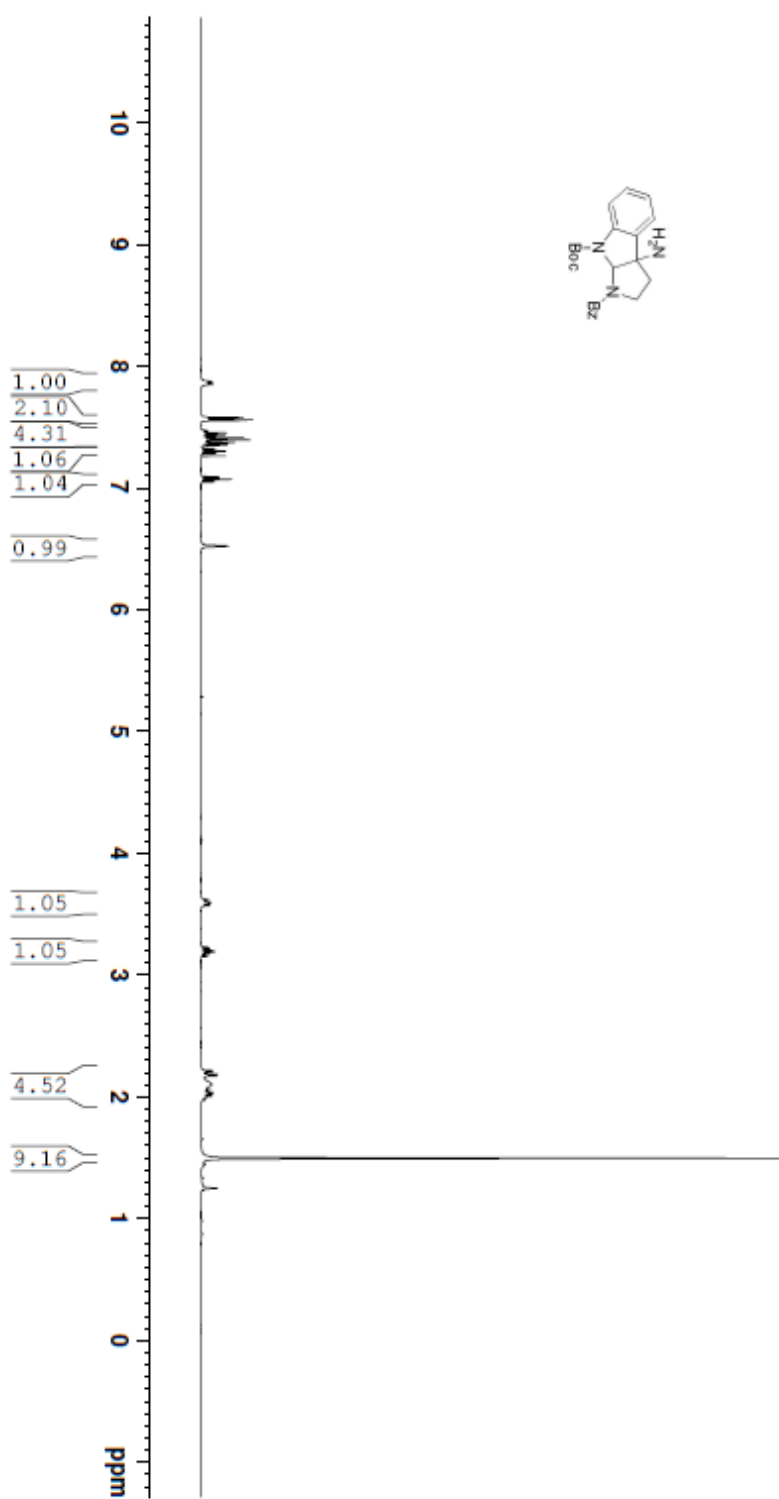

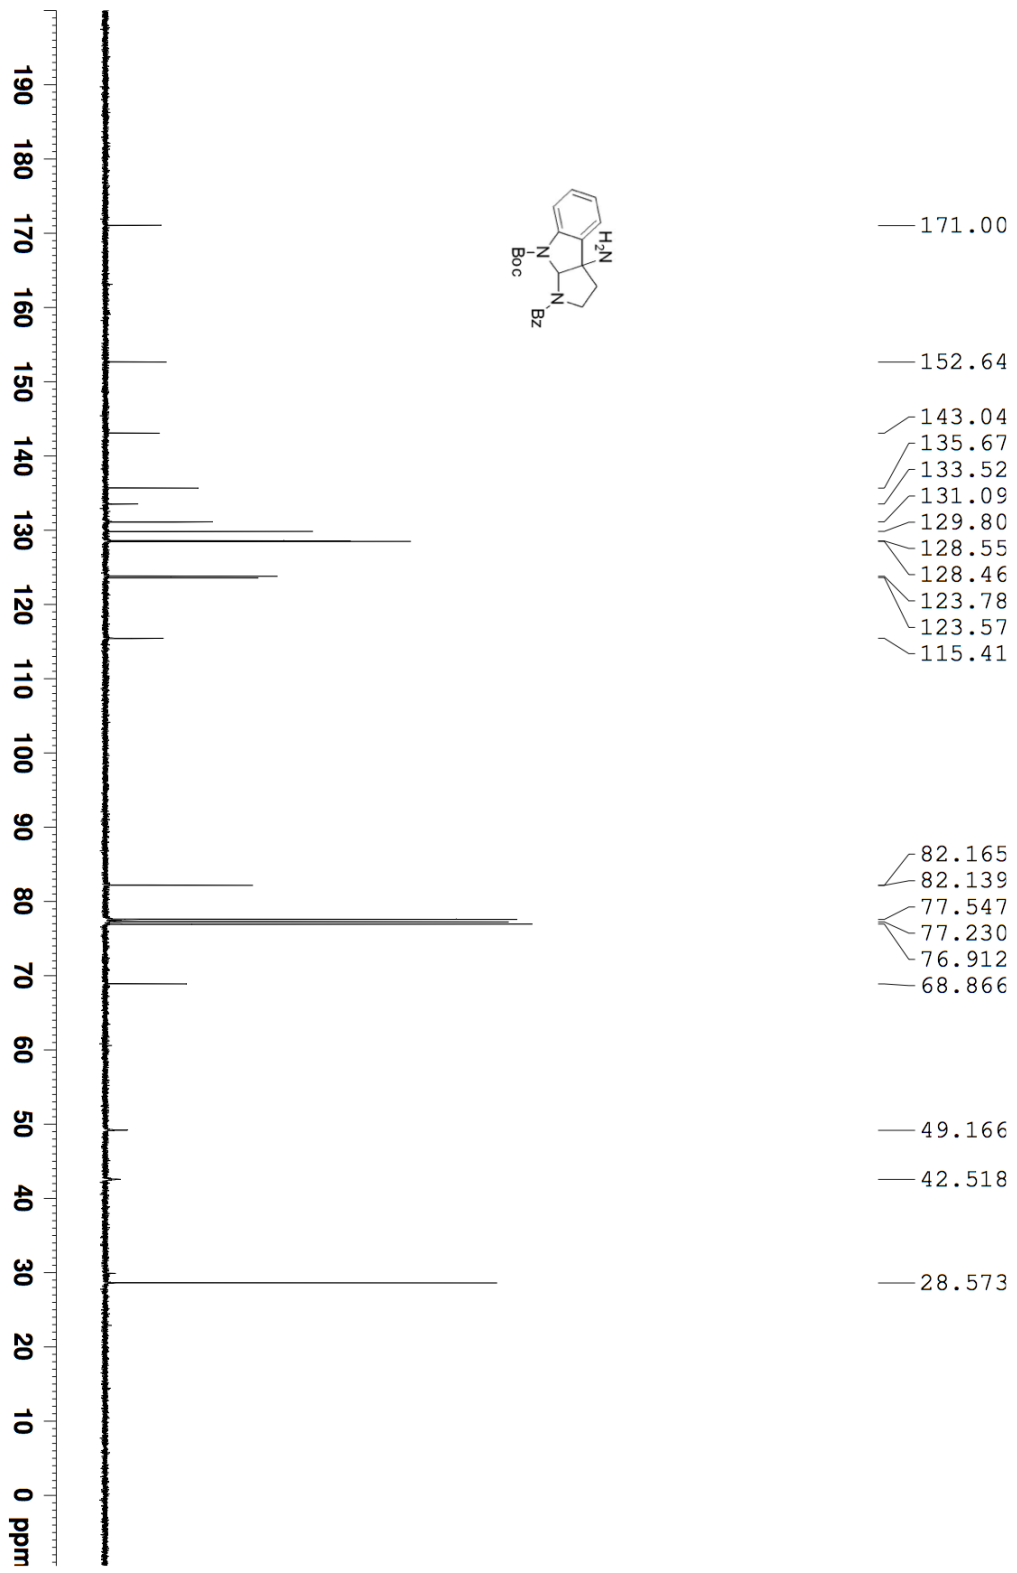

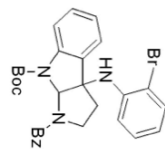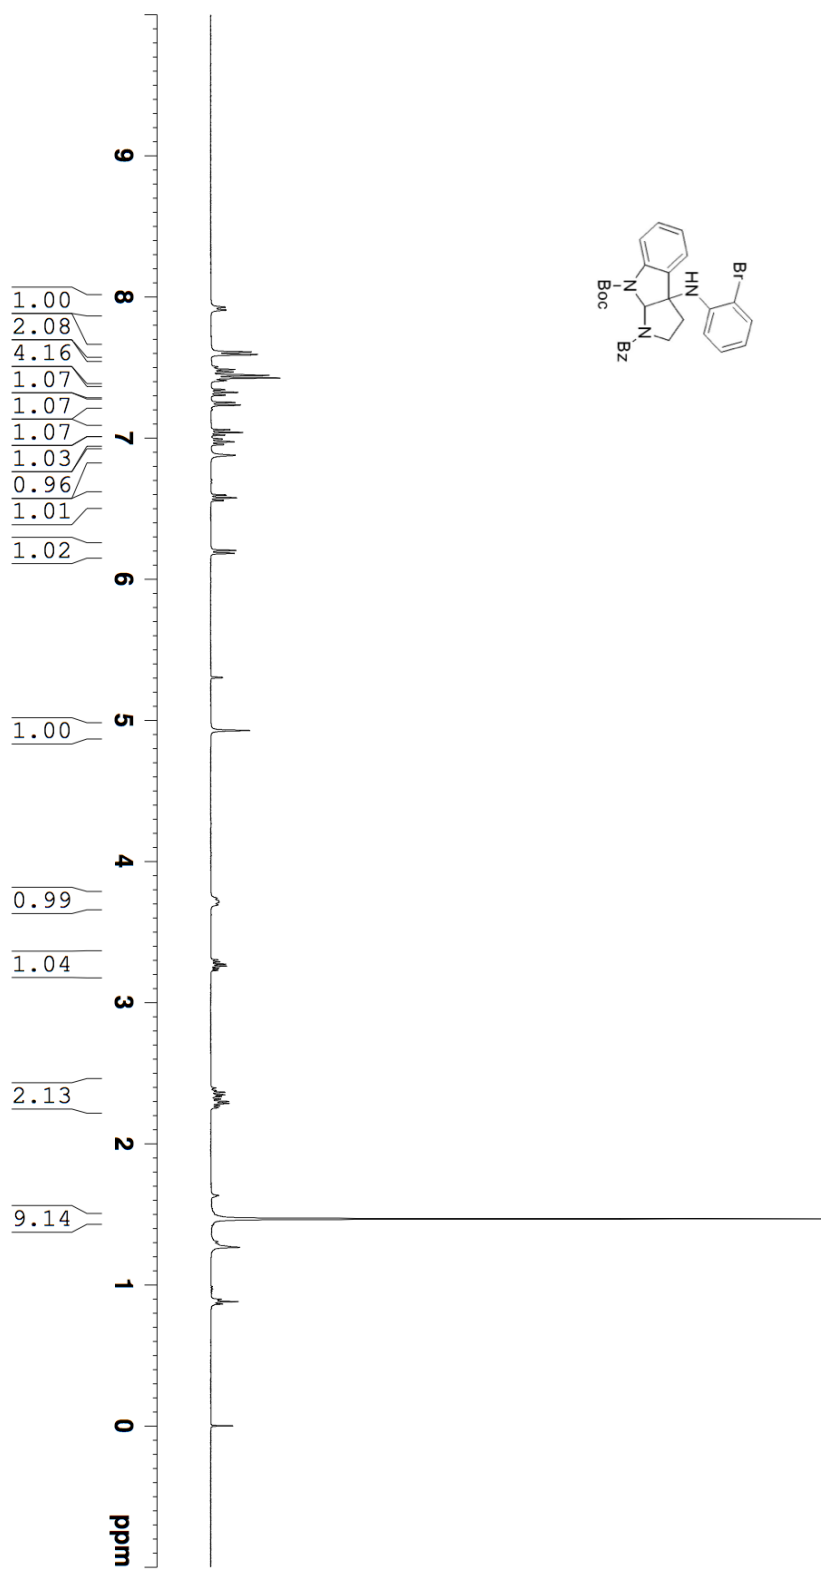

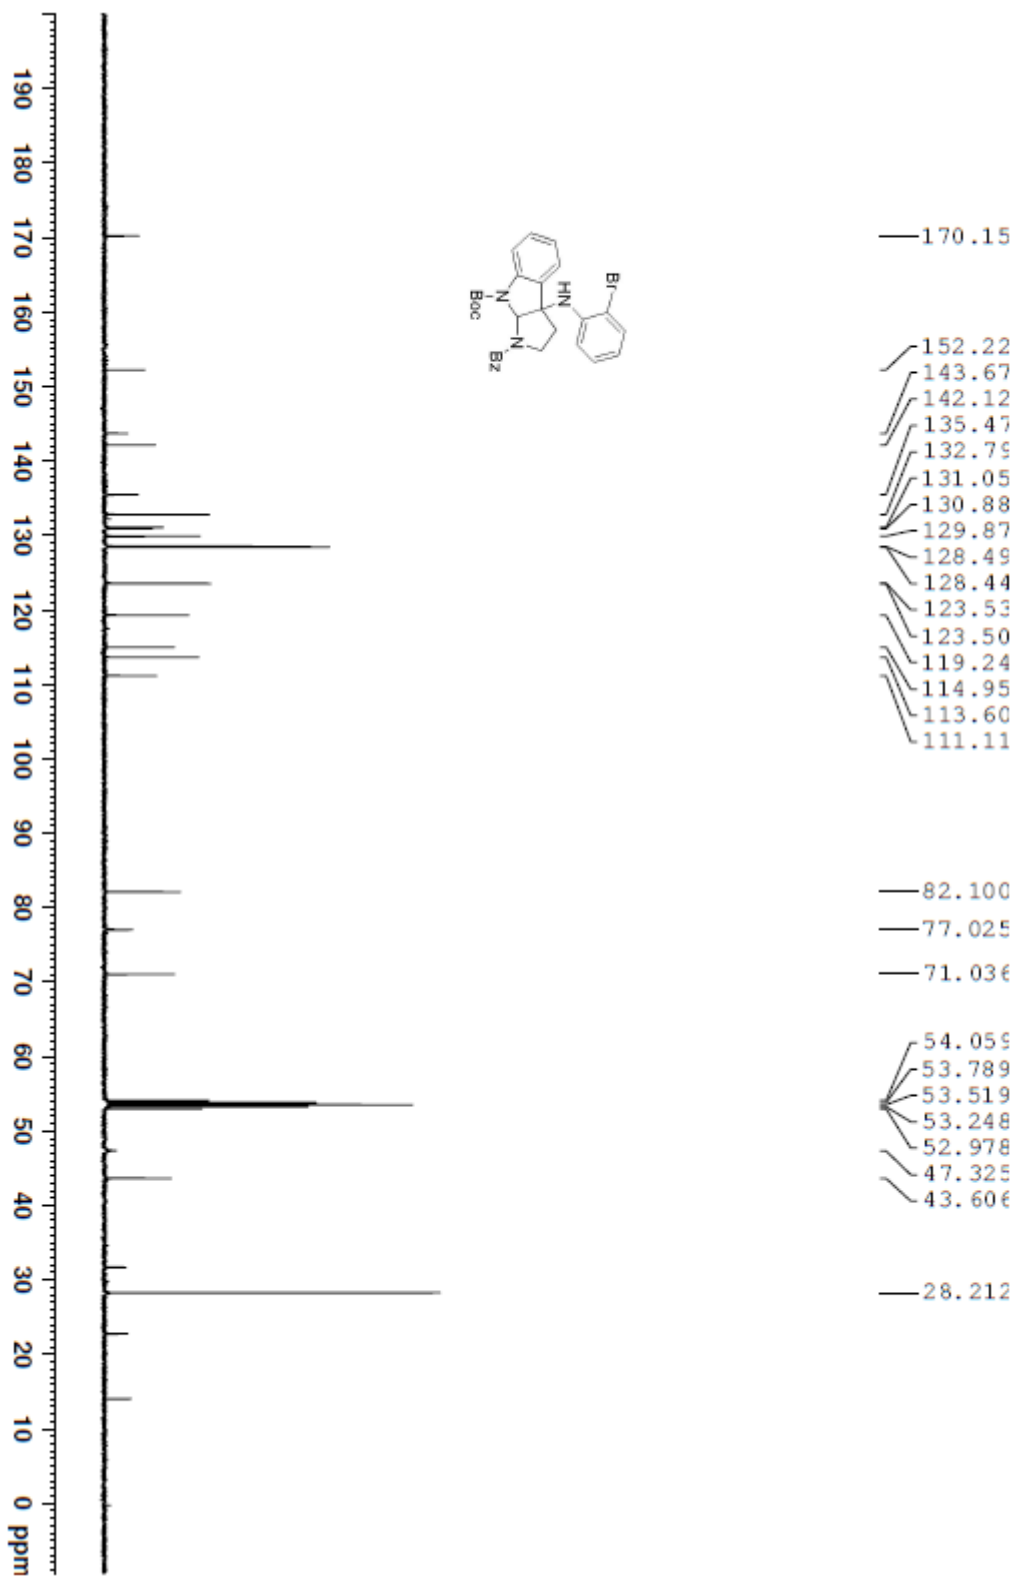

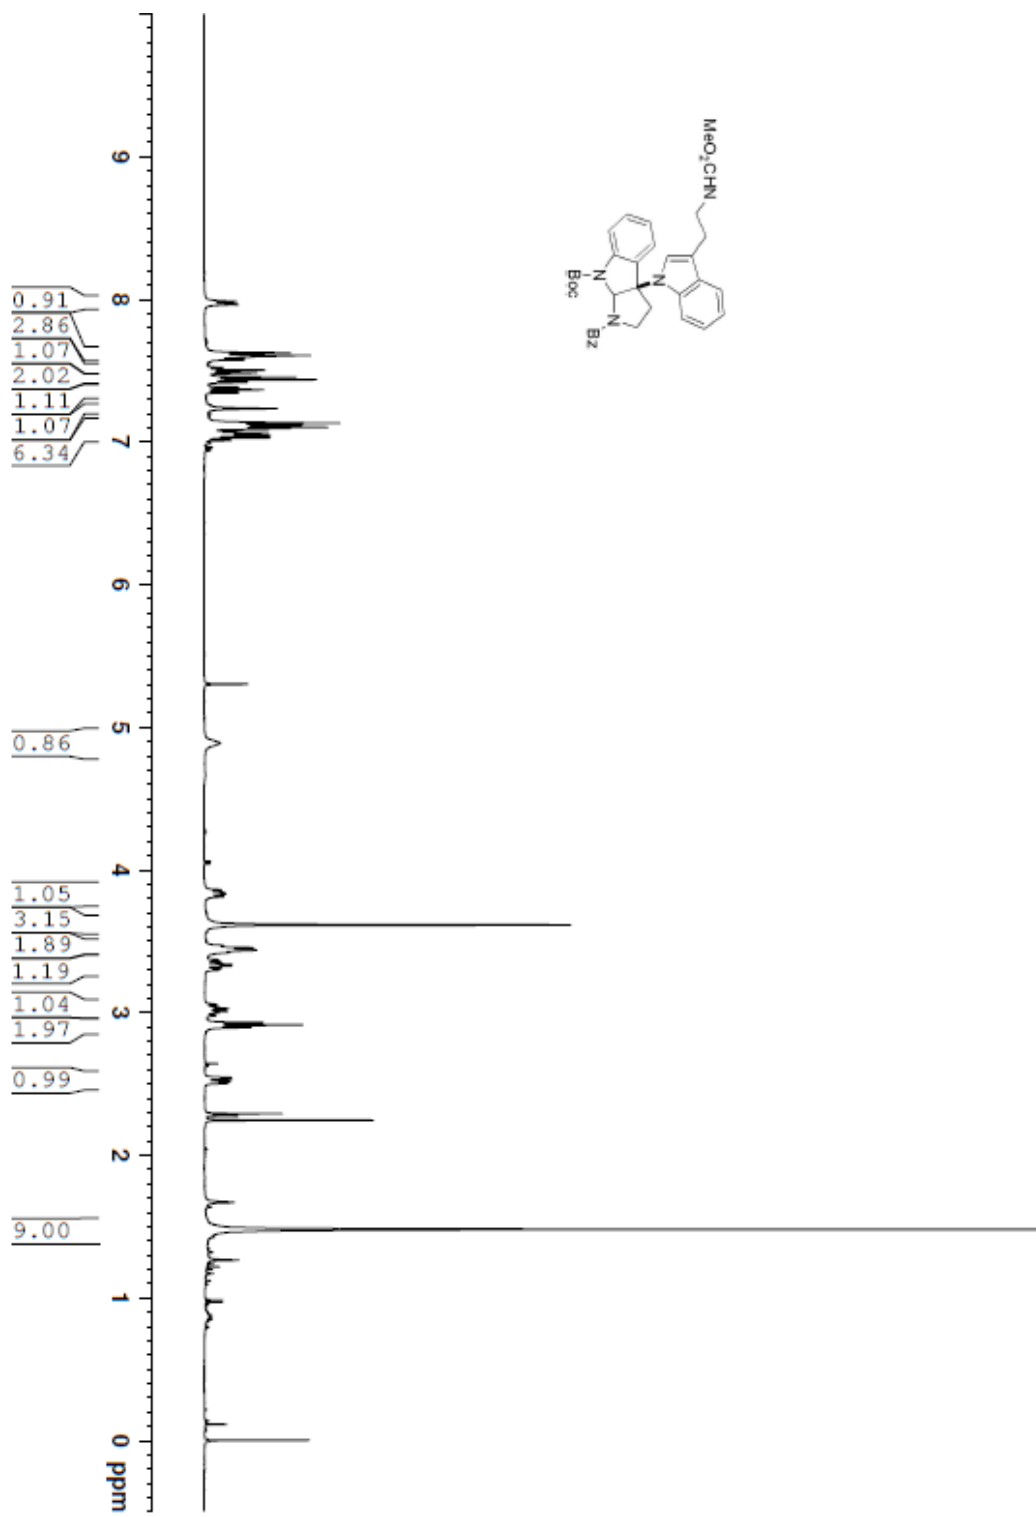

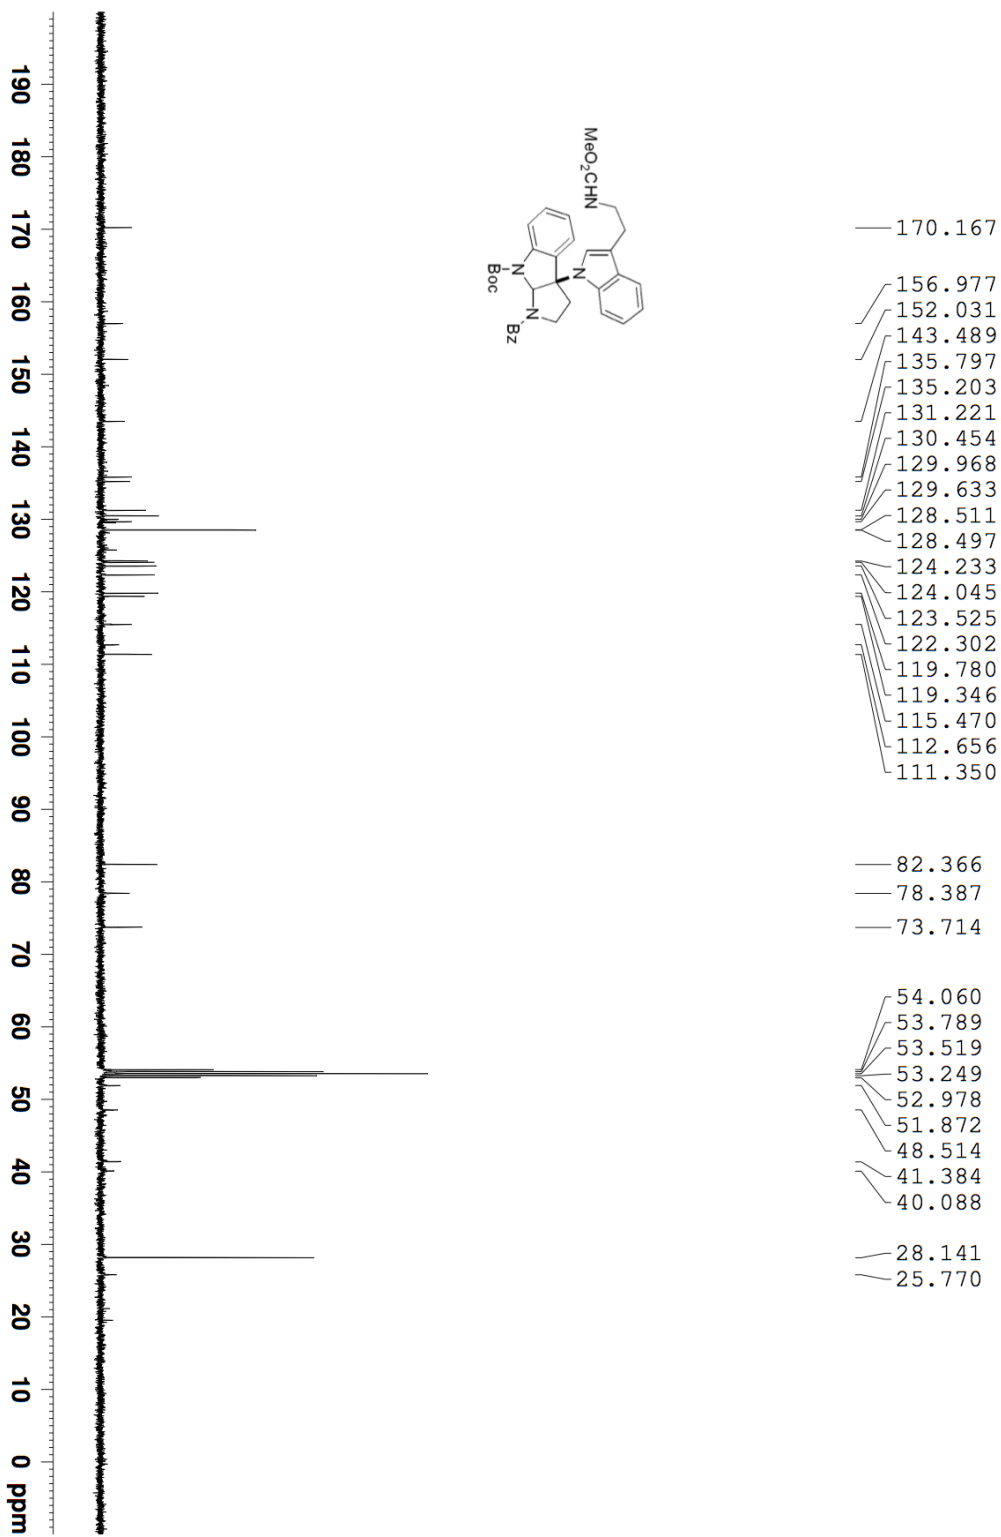

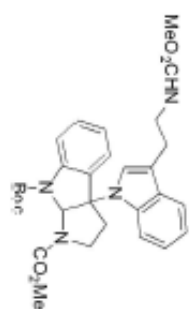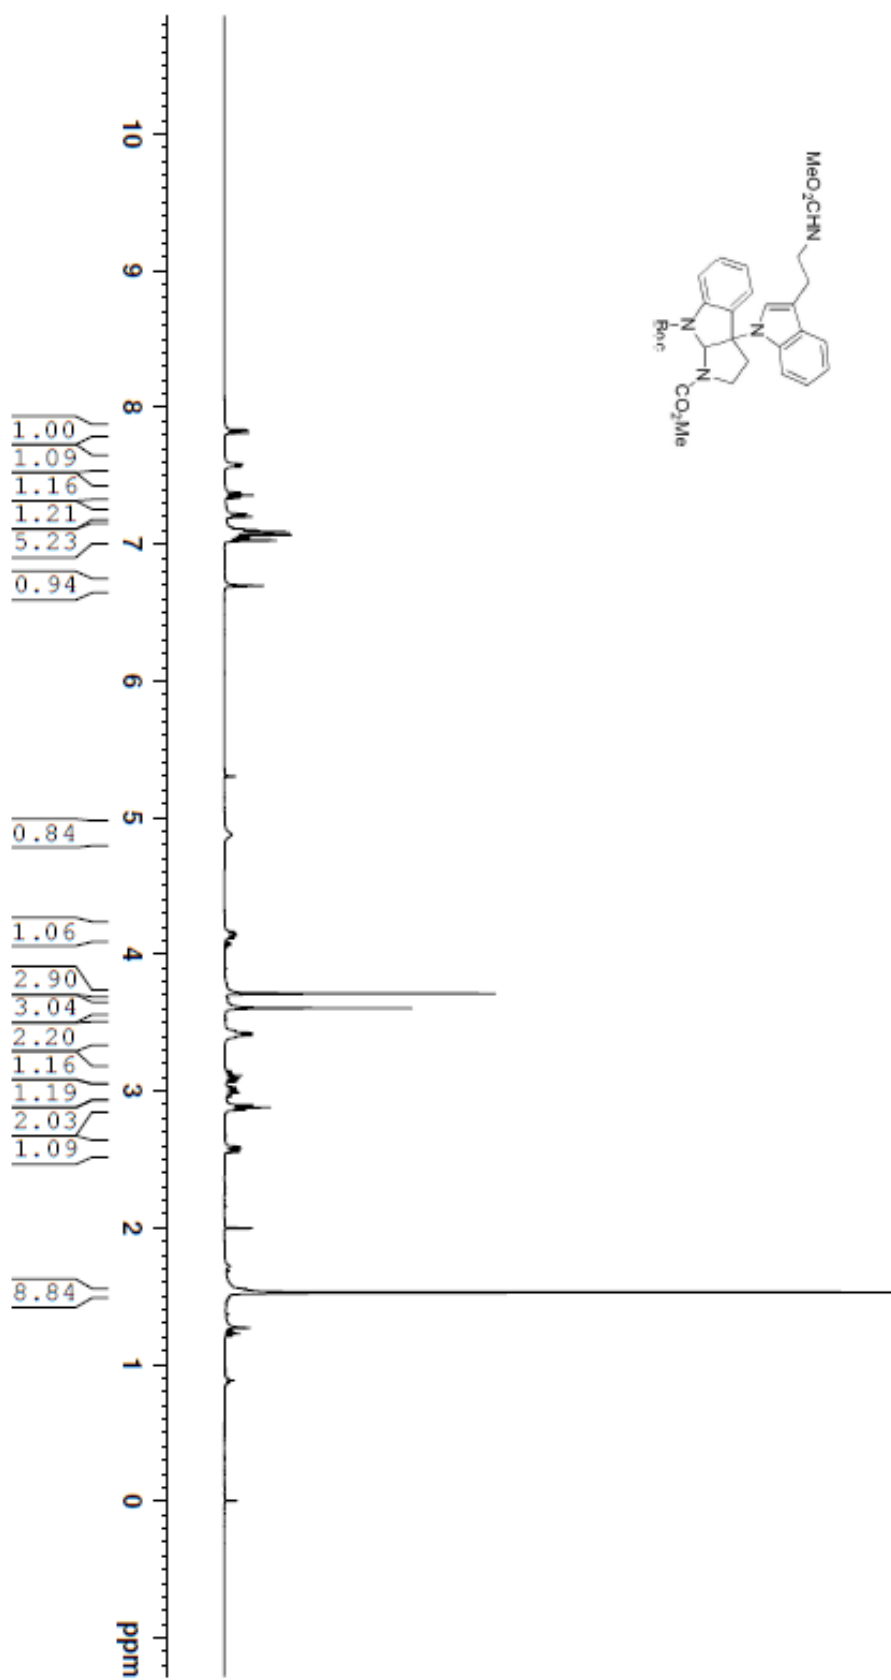



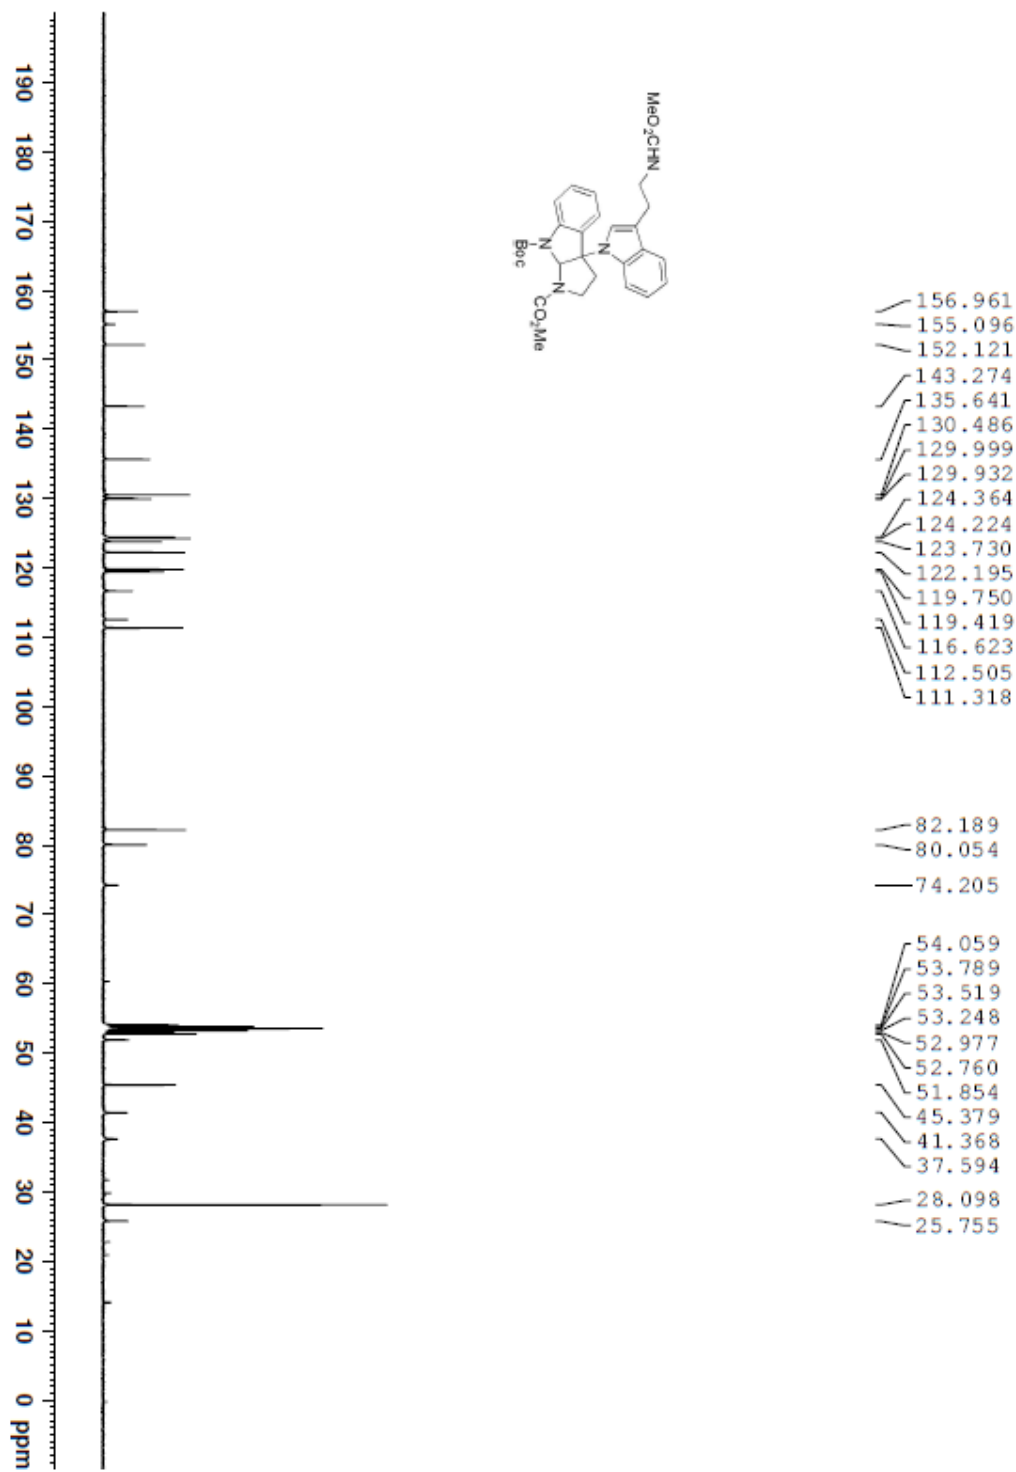

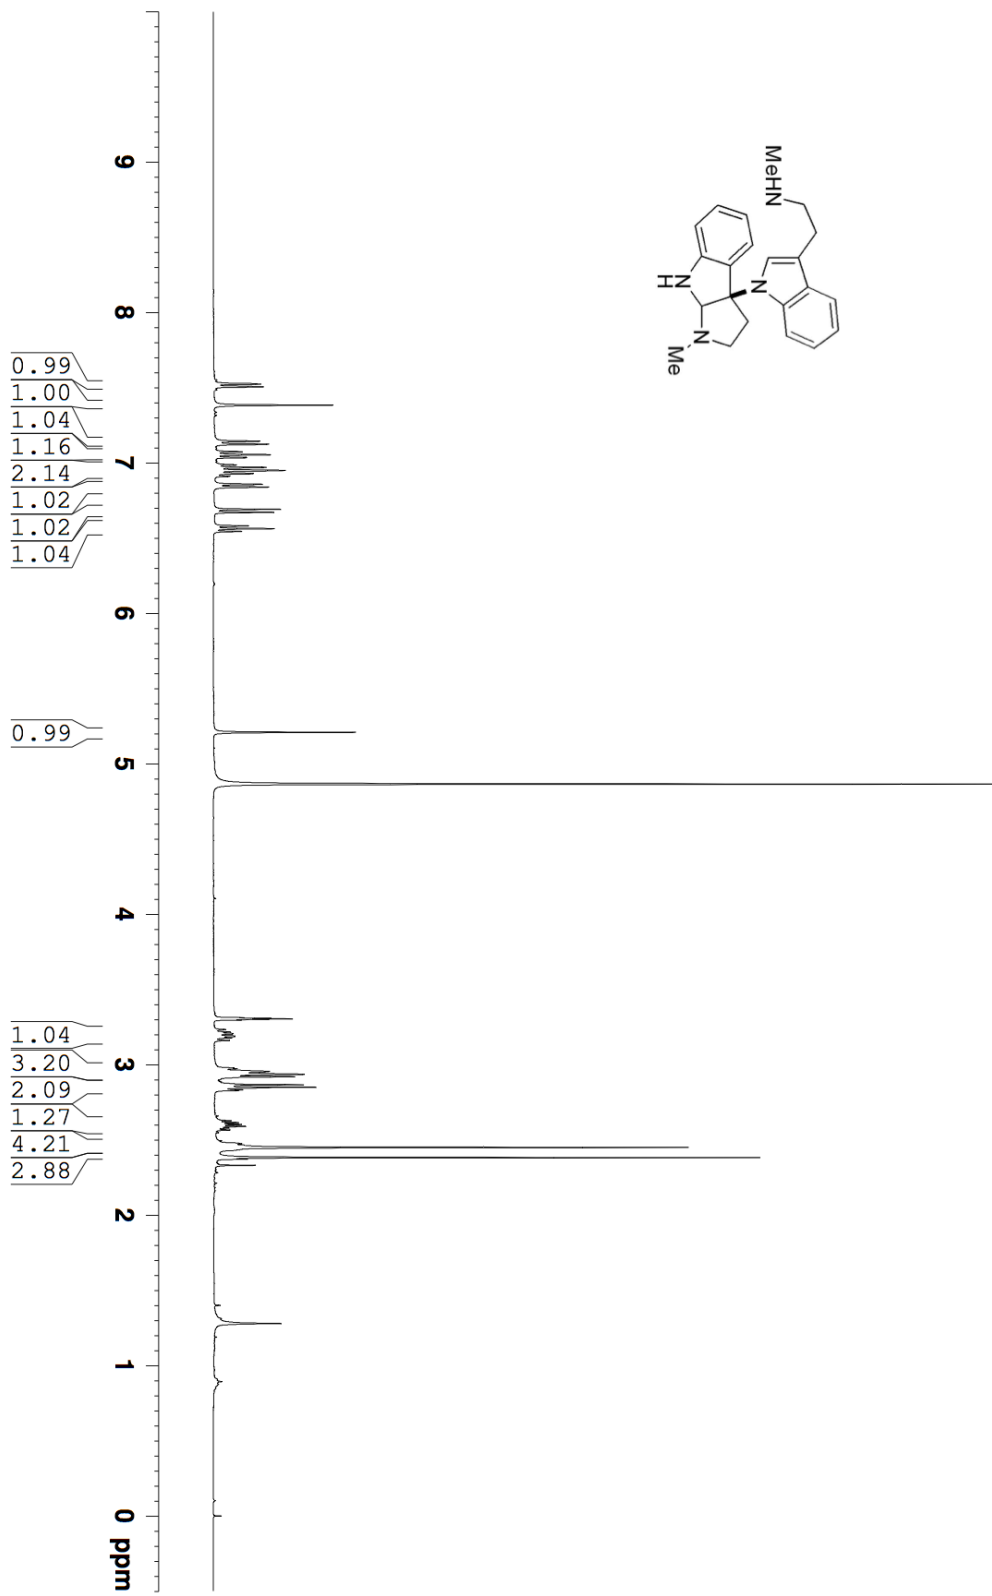

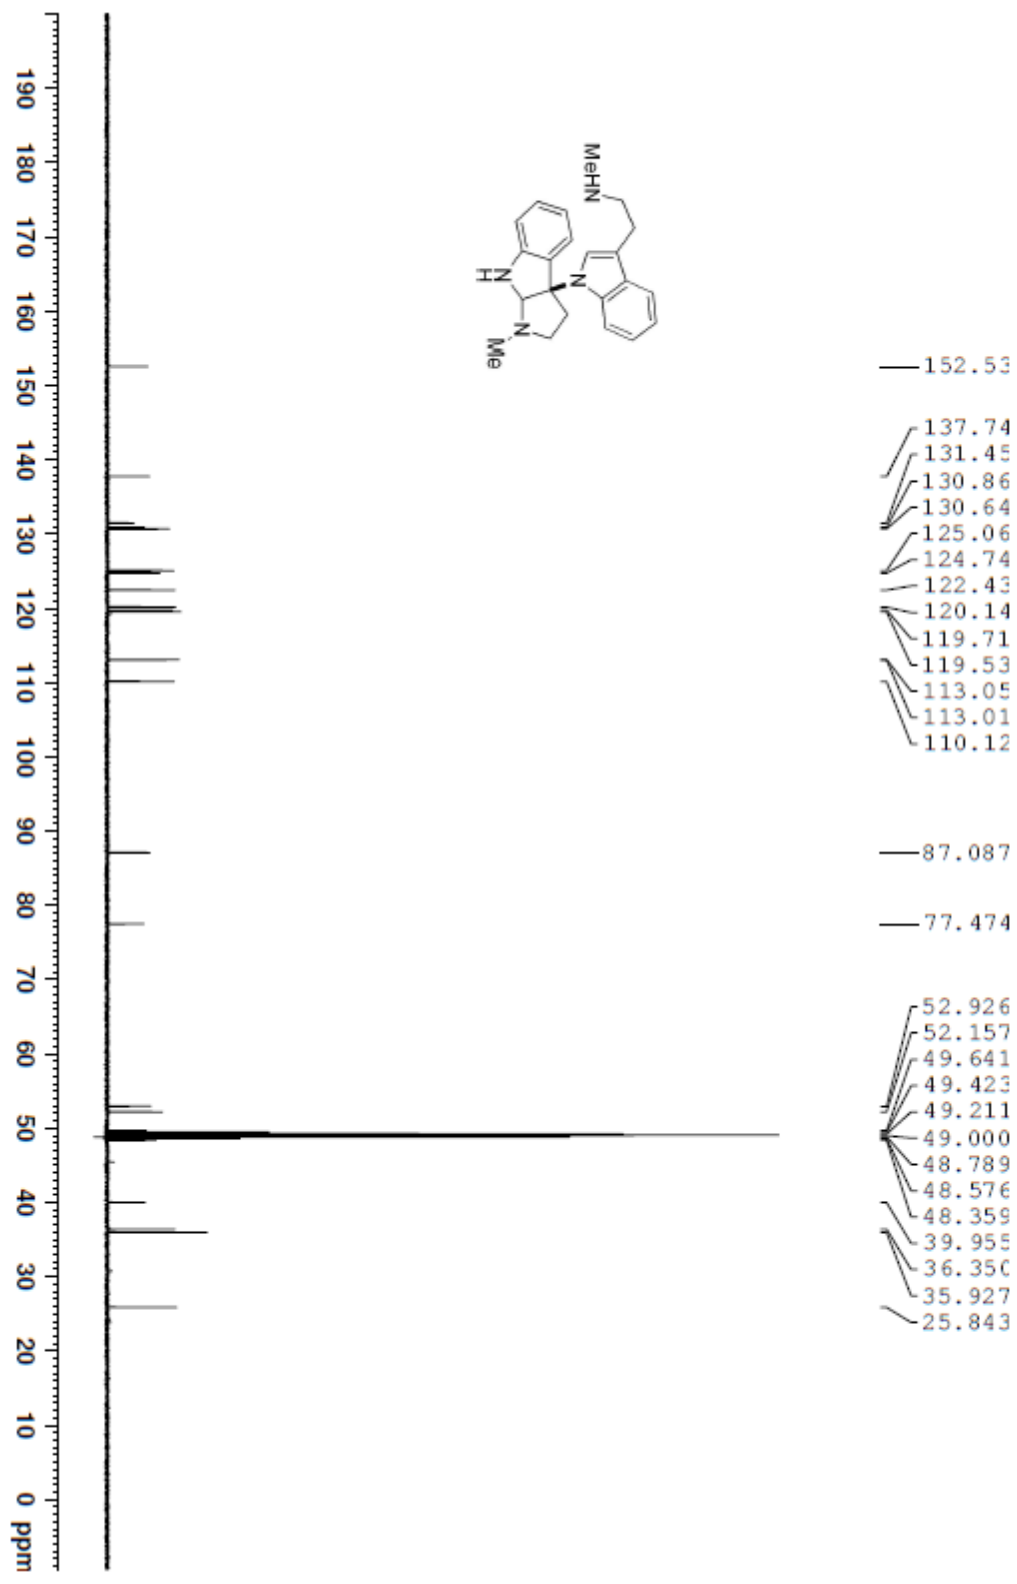

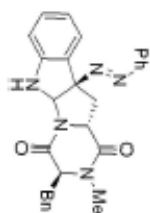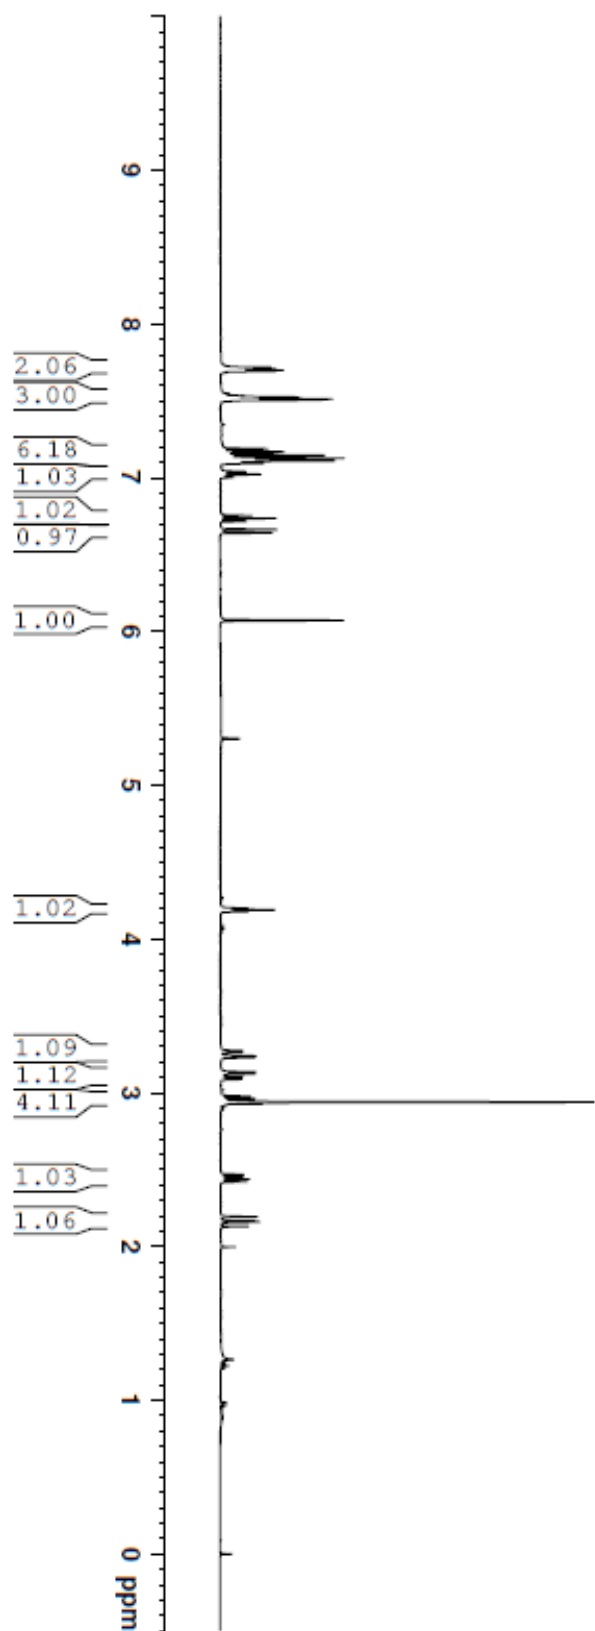

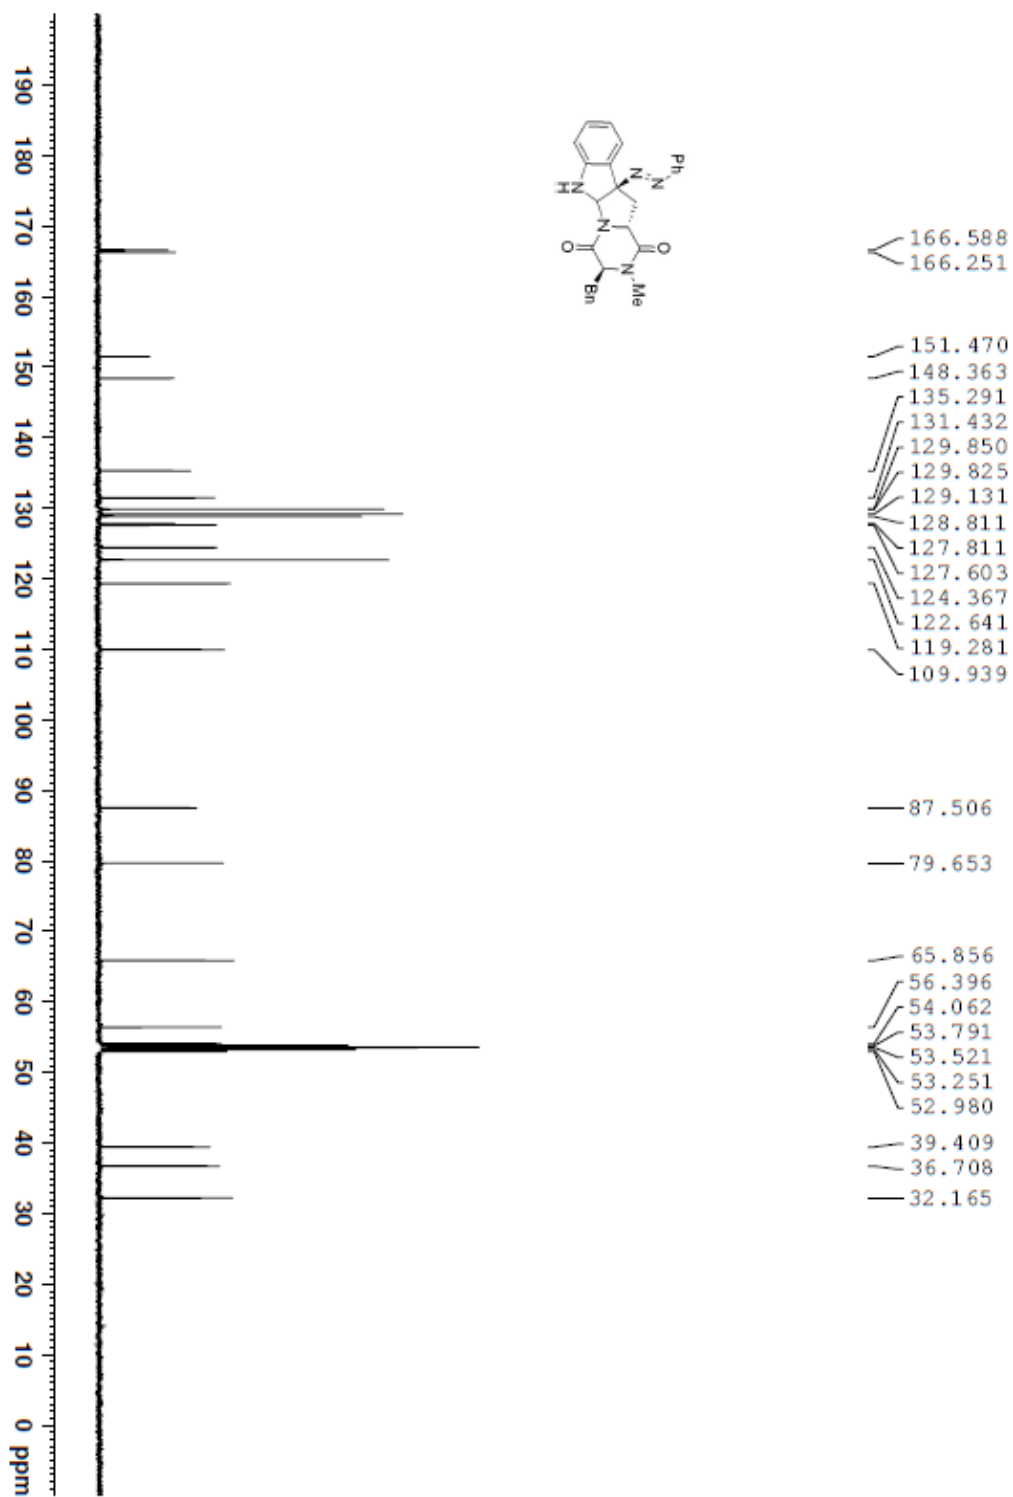

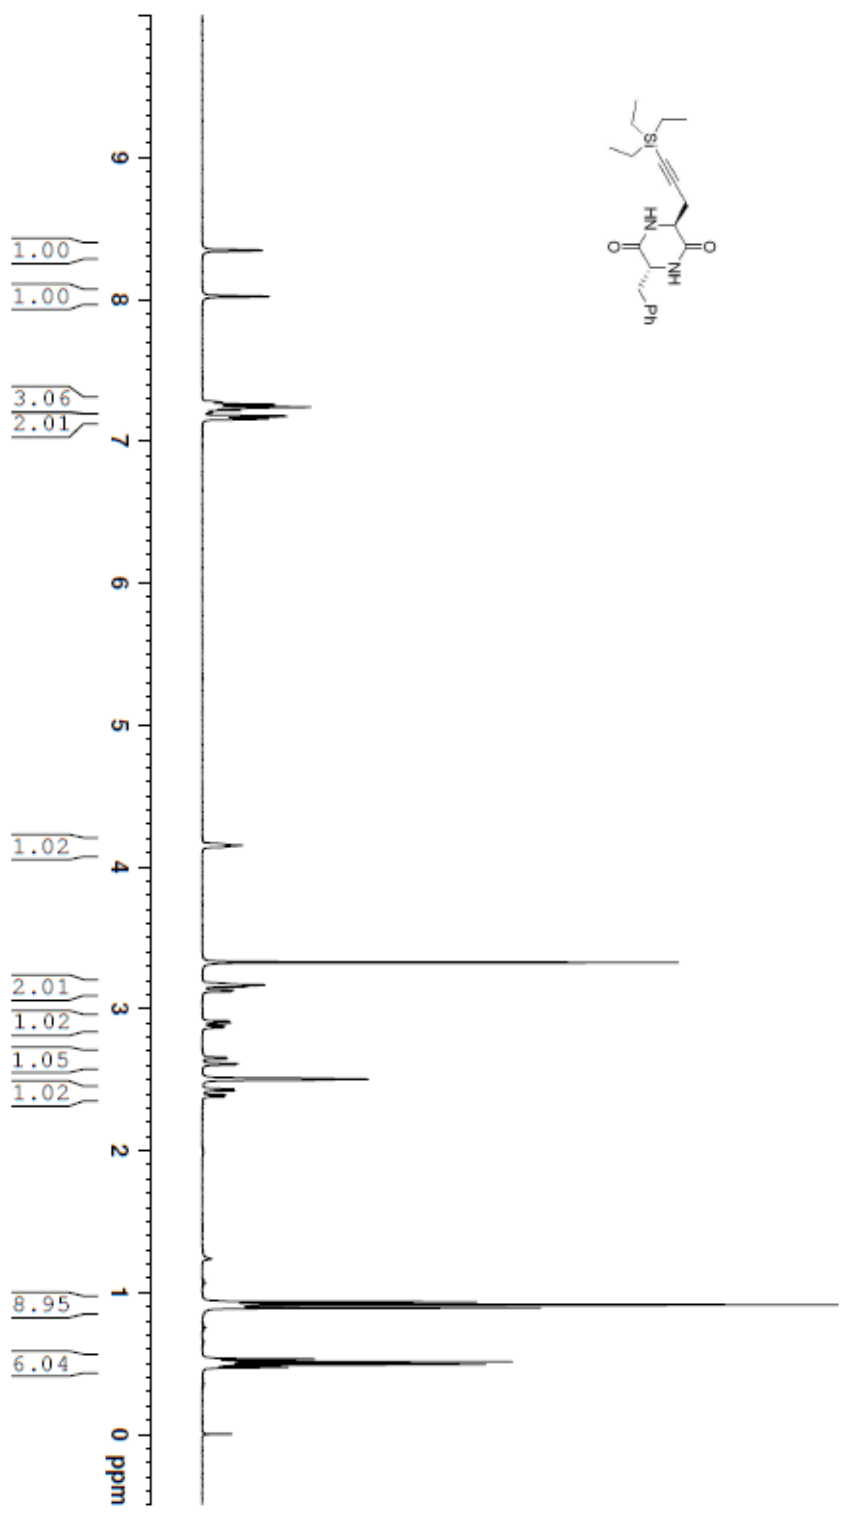

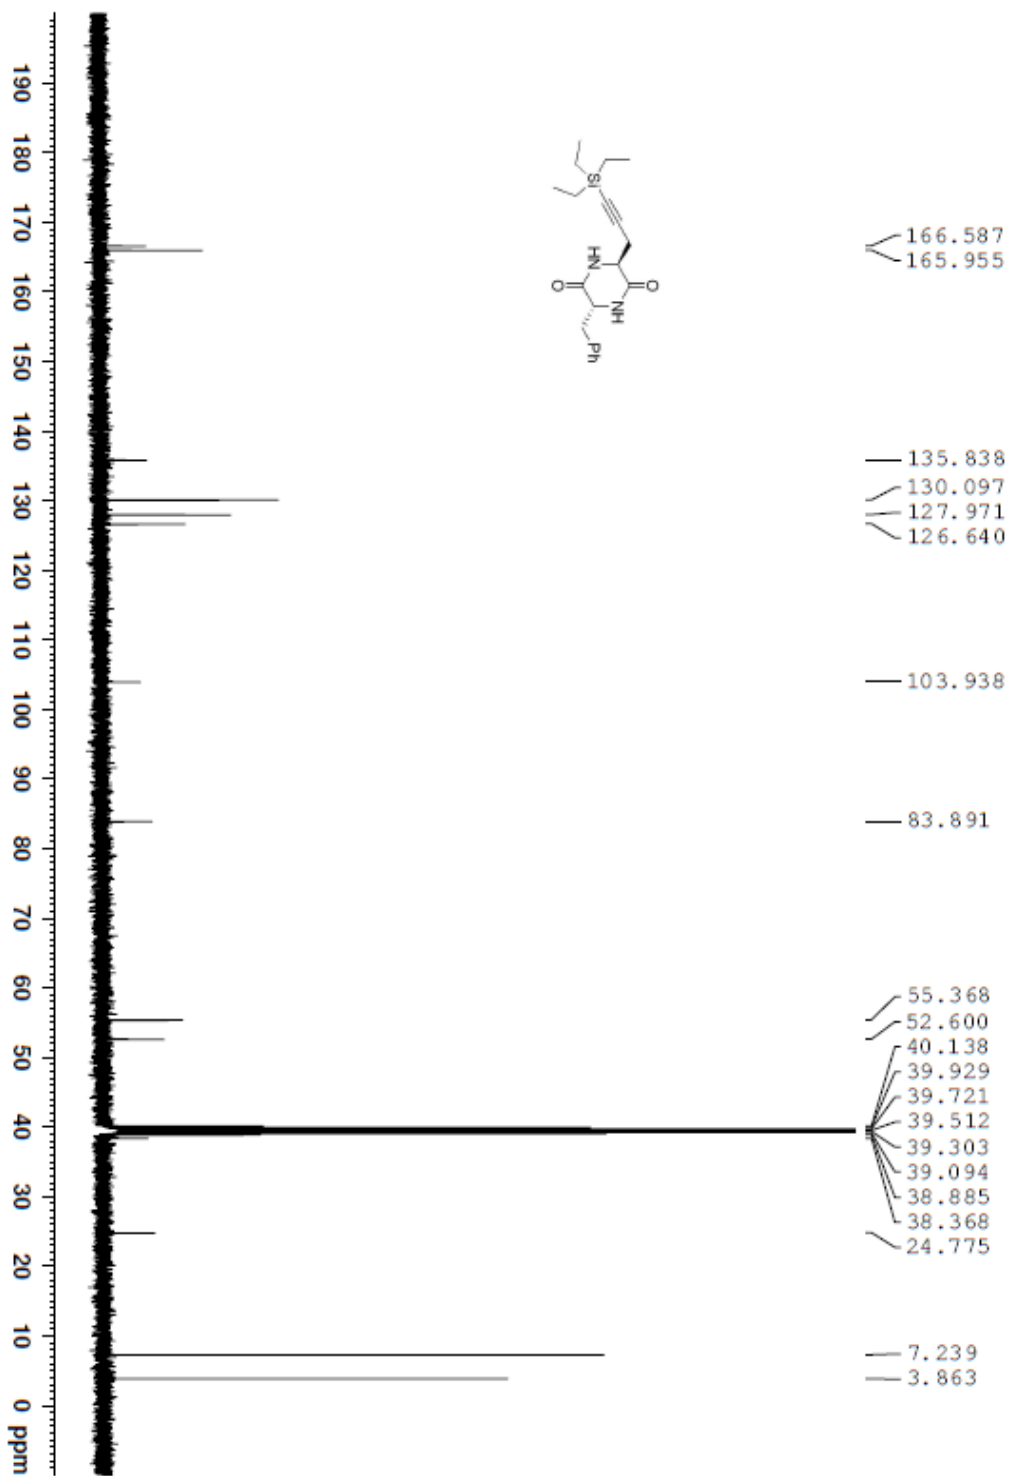

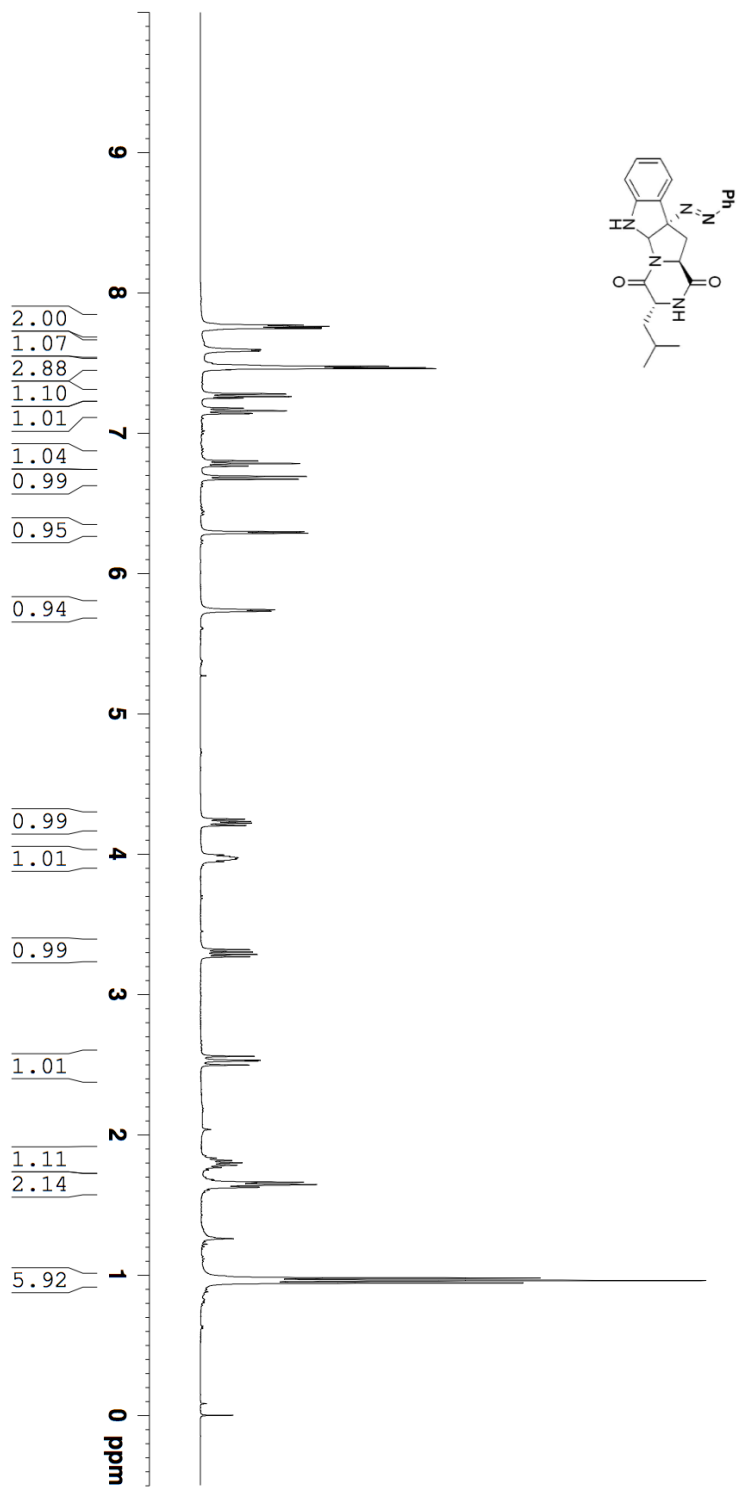



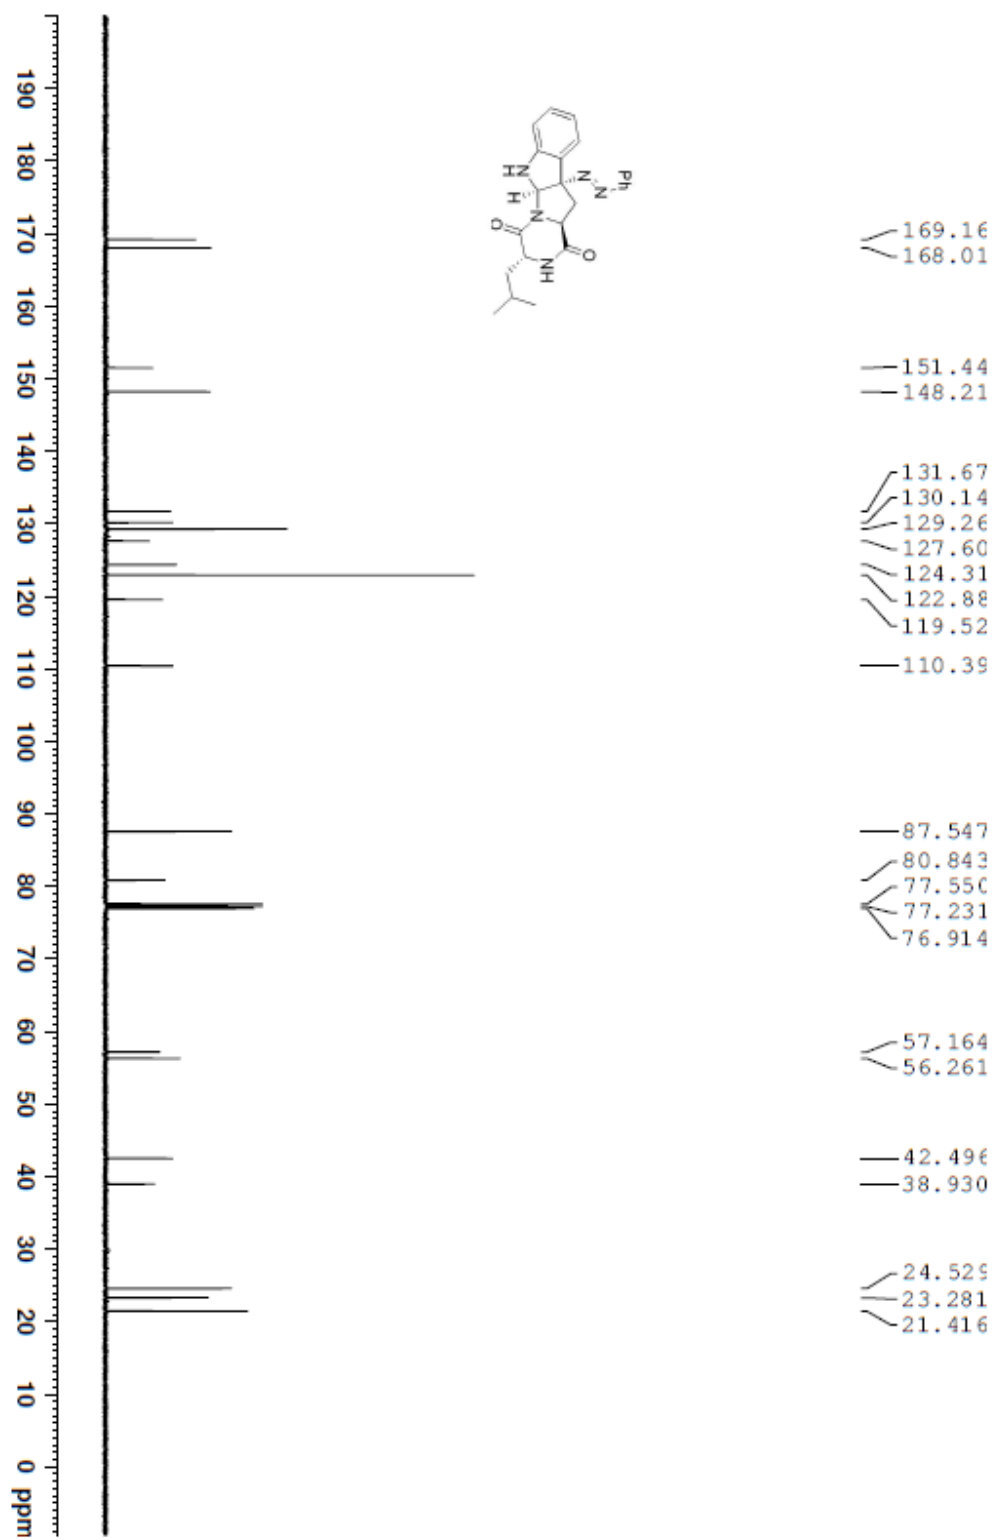

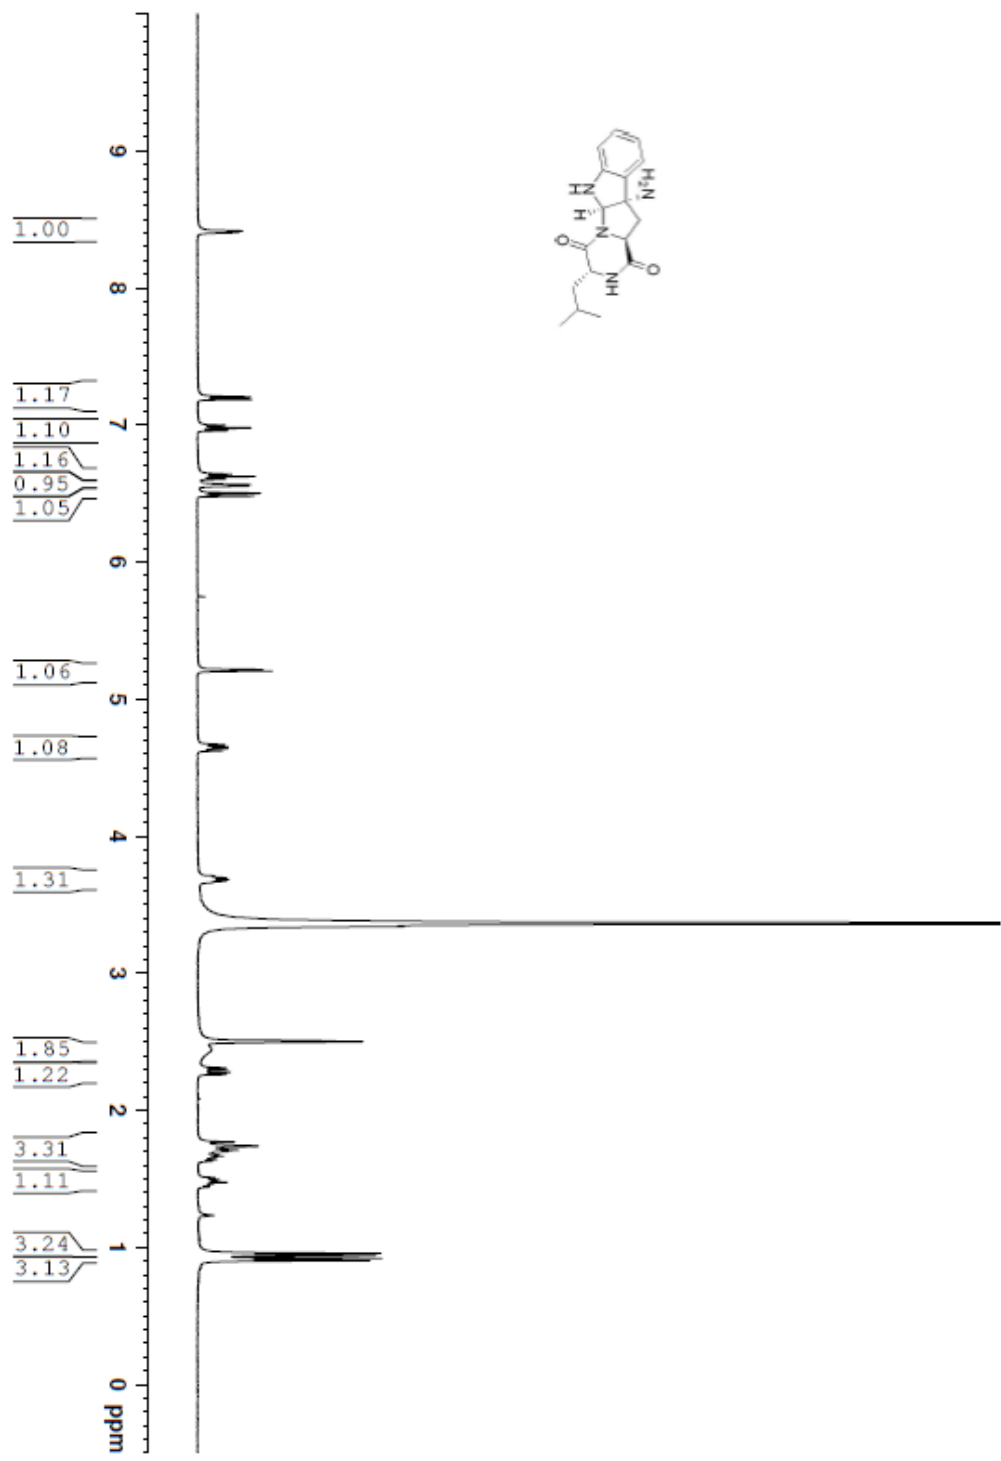

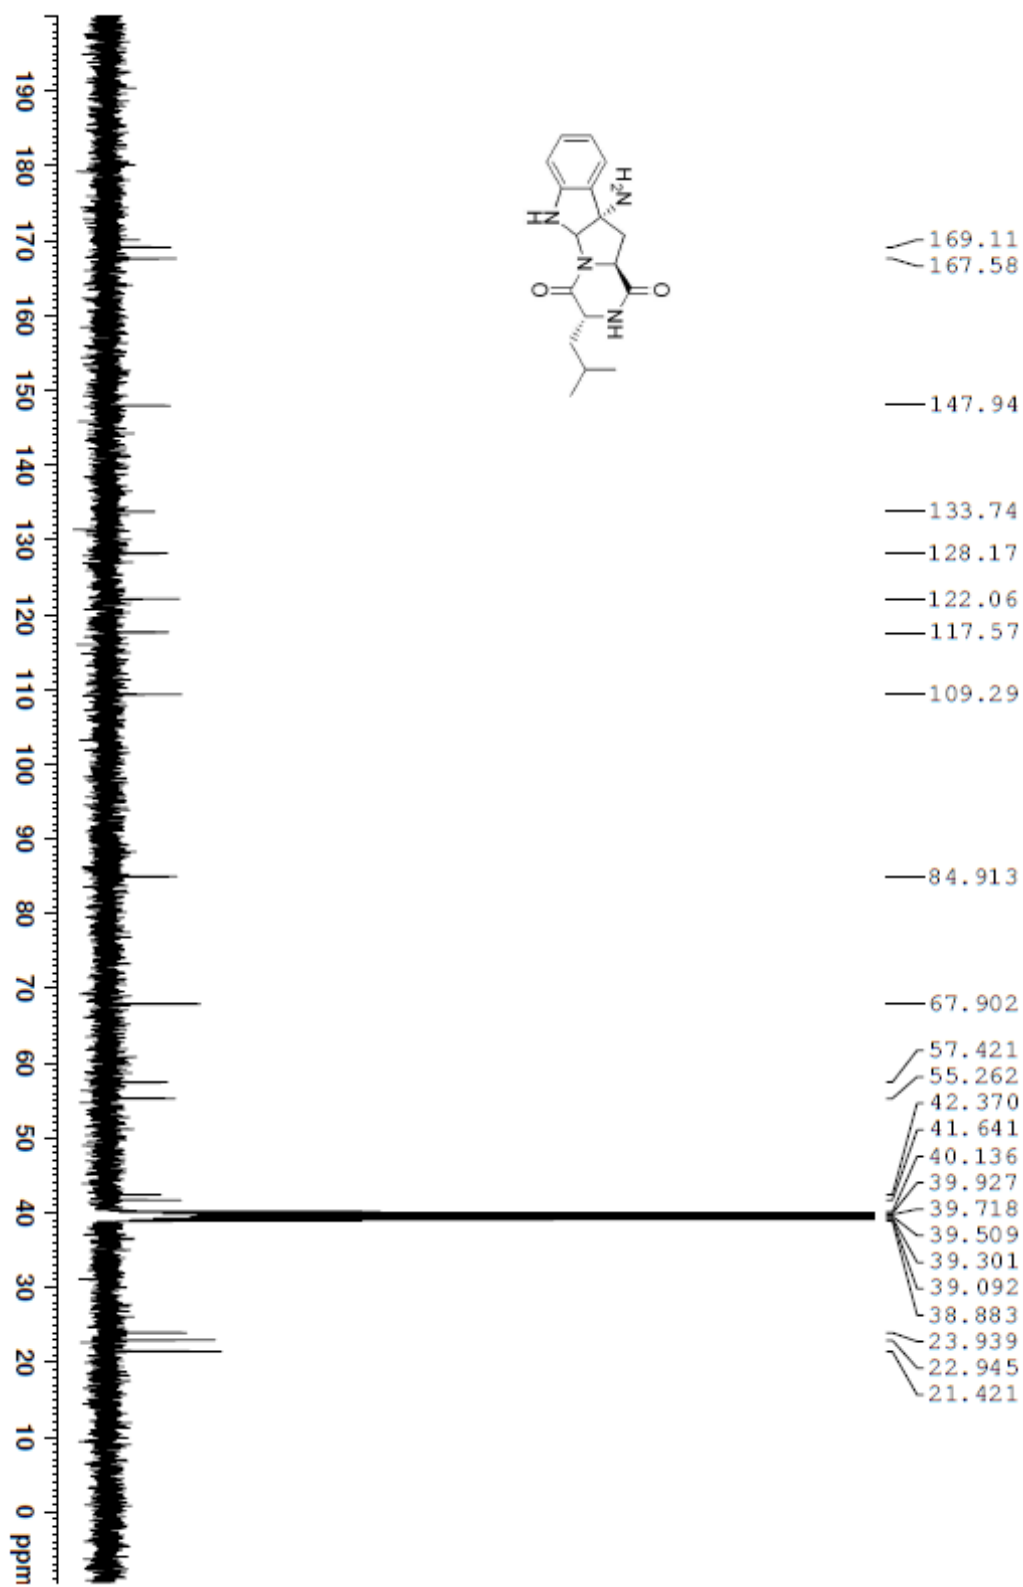

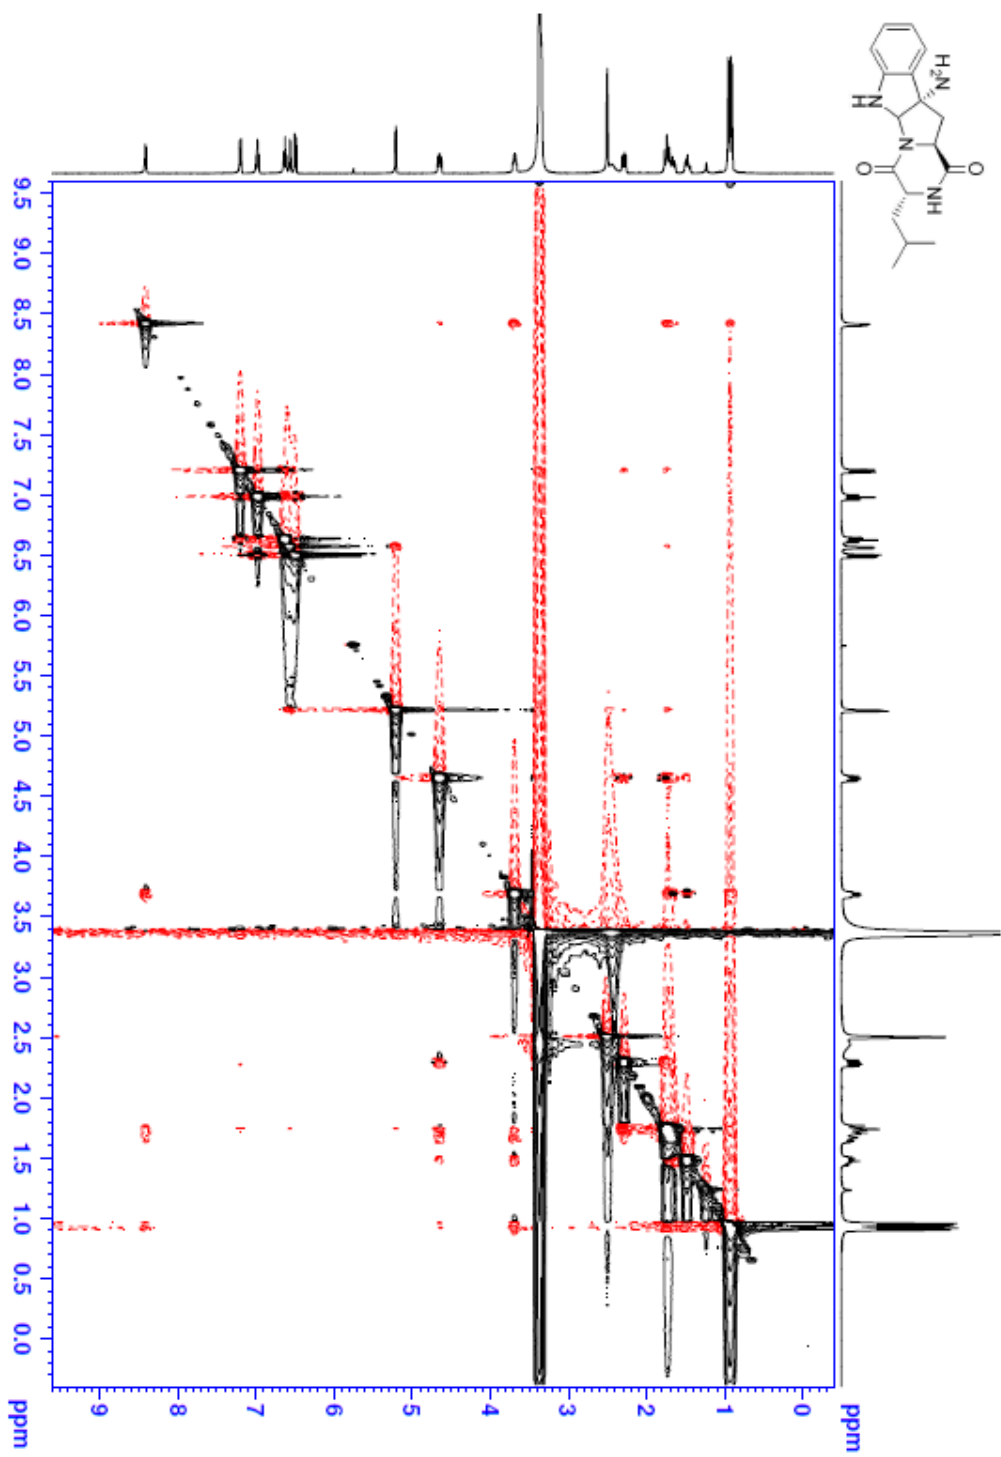

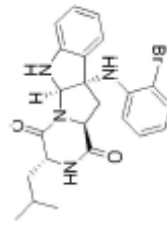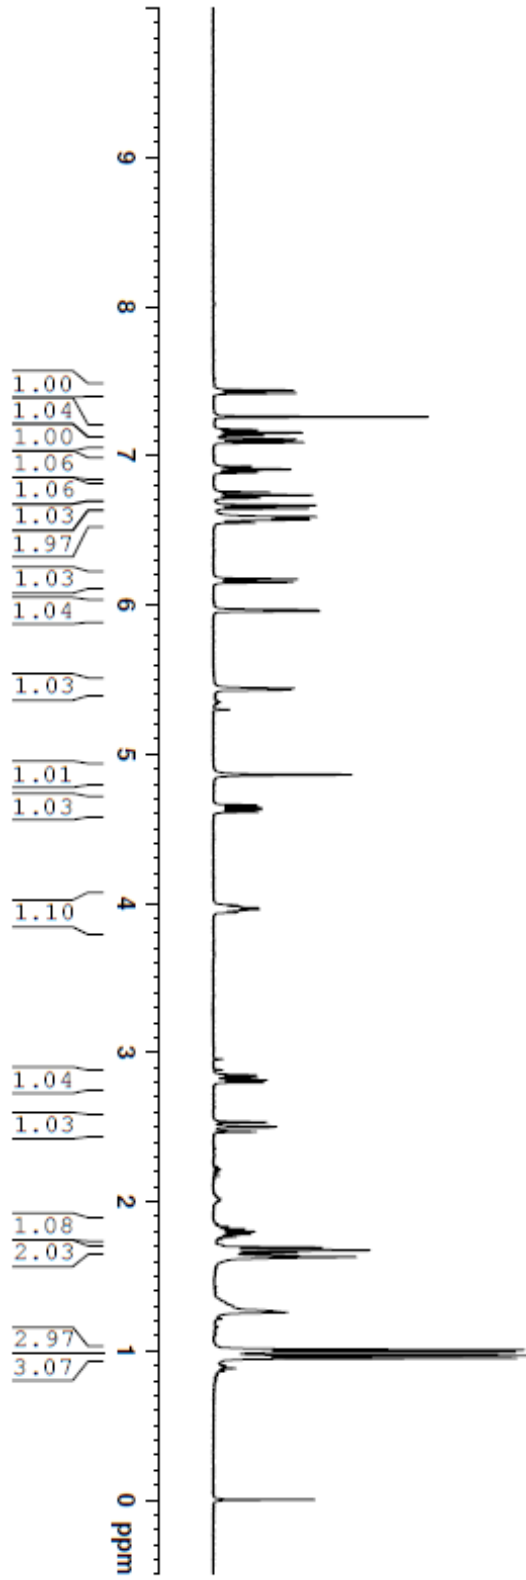

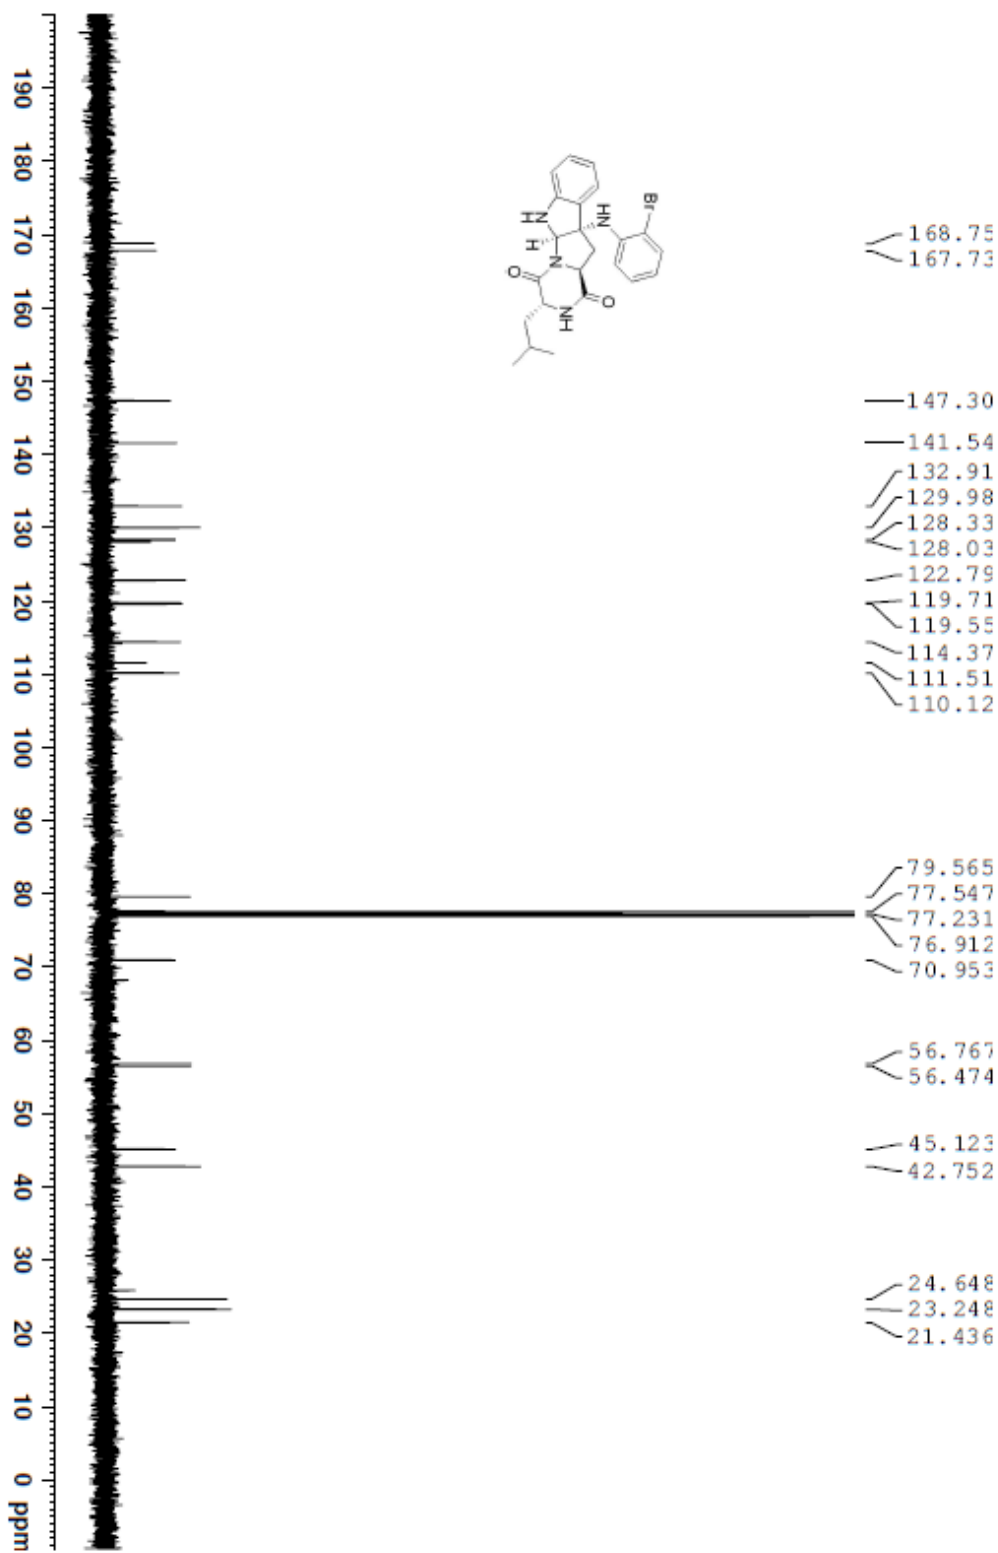

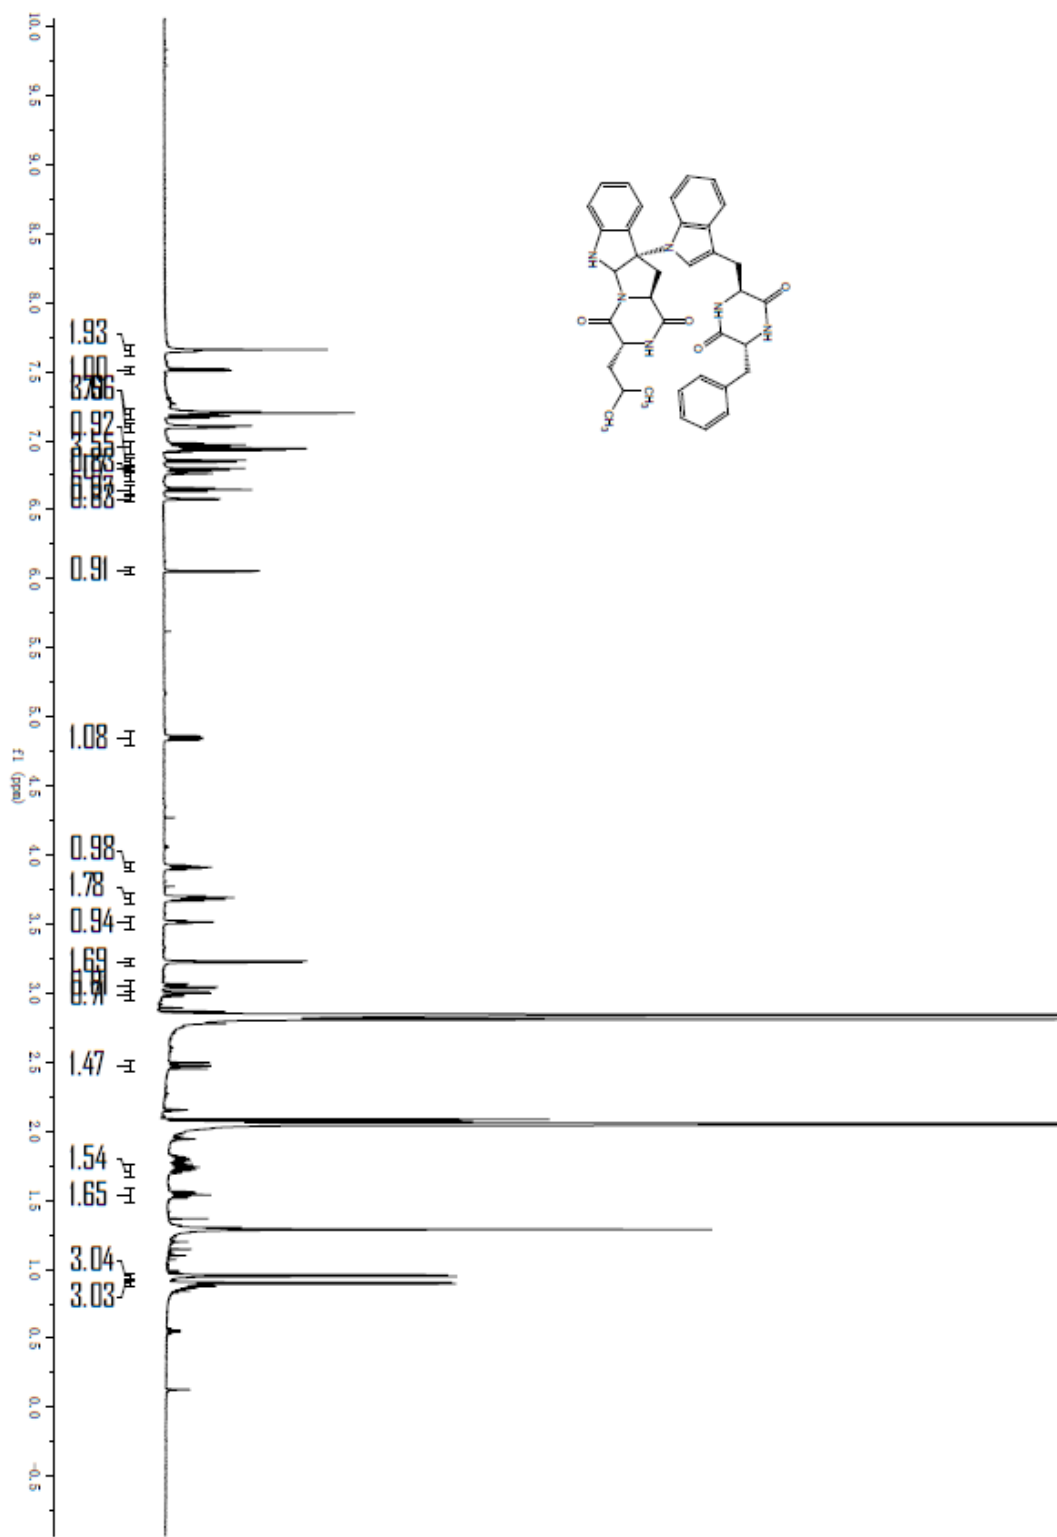

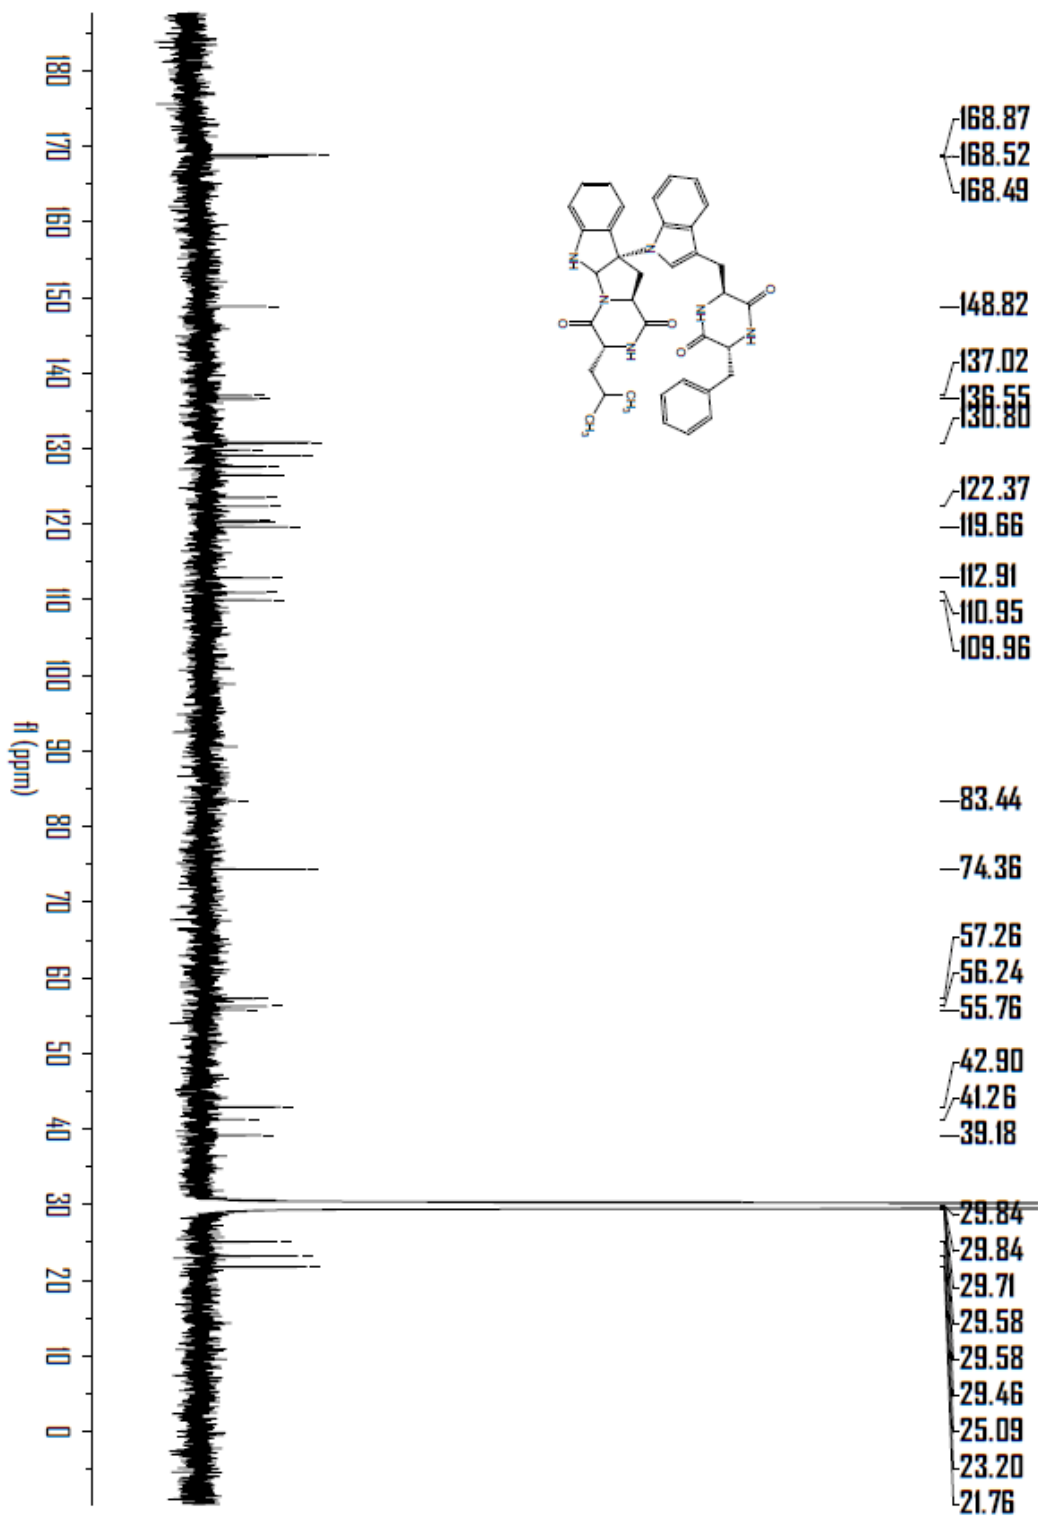

Supplement: SC-006-C5SC00338E-s001.pdf [file SC-006-C5SC00338E-s001.pdf]
